1 Co-evolving wing spots and mating displays are genetically separable traits in *Drosophila*

2

3 Jonathan H. Massey<sup>1,2</sup>, Gavin R. Rice<sup>3</sup>, Anggun Firdaus<sup>4</sup>, Chi-Yang Chen<sup>4</sup>, Shu-Dan Yeh<sup>4</sup>,

4 David L. Stern<sup>2\*</sup>, Patricia J. Wittkopp<sup>1,5\*</sup>

5

6 <sup>1</sup>Department of Ecology and Evolutionary Biology, University of Michigan, Ann Arbor, MI,

7 USA

8 <sup>2</sup>Janelia Research Campus, Howard Hughes Medical Institute, Ashburn, VA, USA

9 <sup>3</sup>Department of Biological Sciences, University of Pittsburgh, Pittsburgh, Pennsylvania, USA

10 15260

11 <sup>4</sup>Department of Life Sciences, National Central University, Taoyuan, Taiwan

12 <sup>5</sup> Department of Molecular, Cellular, and Developmental Biology, University of Michigan, Ann

13 Arbor, MI, USA

14

15 \*Corresponding authors

16 [wittkopp@umich.edu](mailto:wittkopp@umich.edu); [sternd@janelia.hhmi.org](mailto:sternd@janelia.hhmi.org)

17

18 Keywords: *Drosophila*, correlated traits, pigmentation, courtship behavior, *optomotor-blind*

19

20

21

22 **Abstract**

23

24 The evolution of sexual traits often involves correlated changes in morphology and behavior. For

25 example, in *Drosophila*, divergent mating displays are often accompanied by divergent pigment

26 patterns. To better understand how such traits co-evolve, we investigated the genetic basis of

27 correlated divergence in wing pigmentation and mating display between the sibling species

28 *Drosophila elegans* and *D. gunungcola*. *Drosophila elegans* males have an area of black pigment

29 on their wings known as a wing spot and appear to display this spot to females by extending their

30 wings laterally during courtship. By contrast, *D. gunungcola* lacks both of these traits. Using

31 Multiplexed Shotgun Genotyping (MSG), we identified a ~440 kb region on the X chromosome

32 that behaves like a genetic switch controlling the presence or absence of male-specific wing

33 spots. This region includes the candidate gene *optomotor-blind (omb)*, which plays a critical role

34 in patterning the *Drosophila* wing. The genetic basis of divergent wing display is more complex,

35 with at least two loci on the X chromosome and two loci on autosomes contributing to its

36 evolution. Introgressing the X-linked region affecting wing spot development from *D.*

37 *gunungcola* into *D. elegans* reduced pigmentation in the wing spots but did not affect the wing

38 display, indicating that these are genetically separable traits. Consistent with this observation,

39 broader sampling of wild *D. gunungcola* populations confirmed the wing spot and wing display

40 are evolving independently: some *D. gunungcola* males performed wing displays similar to *D.*

41 *elegans* despite lacking wing spots. These data suggest that correlated selection pressures rather

42 than physical linkage or pleiotropy are responsible for the coevolution of these morphological

43 and behavioral traits. They also suggest that the change in morphology evolved prior to the  
44 change in behavior.

45

## 46 **Introduction**

47

48 Animals often use colorful morphological structures to communicate with prospective mates  
49 during courtship (McKinnon and Pierotti, 2010). In vertebrates and invertebrates, pigmented  
50 bodies or wings often evolve together with specific components of courtship behavior that  
51 animals use to display their colorful anatomy (Loxton, 1979; Endler, 1991; Sinervo et al., 2000;  
52 White et al., 2015). These correlated differences evolve both within and between populations,  
53 frequently distinguishing males from females or closely related species (Gray and McKinnon,  
54 2007; McKinnon and Pierotti, 2010). In the handful of case studies examining the genetic basis  
55 of such co-evolving traits, linkage mapping and genome-wide association studies (GWAS) have  
56 shown that loci affecting pigmentation patterning tend to co-localize with loci affecting variation  
57 in mating behaviors (Lindholm and Breden, 2002; Kronforst *et al.*, 2006; Yeh *et al.*, 2006;  
58 Thomas *et al.*, 2008; Kupper *et al.*, 2016; Lamichhaney *et al.*, 2016; Merrill *et al.*, 2019;  
59 reviewed in McKinnon and Pierotti, 2010). That is, physical linkage of genetic variants underlies  
60 phenotypic correlations between mating behavior and pigmentation. Interestingly, these loci also  
61 tend to explain much of the variation observed for both traits (e.g., Kronforst *et al.*, 2006;  
62 Kupper *et al.*, 2016; Lamichhaney *et al.*, 2016). A key challenge is determining how frequently  
63 these patterns of genomic architecture underlie correlated evolution and whether a single  
64 pleiotropic locus or separate linked loci are involved.

65

66 Disentangling whether pleiotropic or physically linked loci underlie patterns of correlated  
67 evolution between pigmentation and mating behavior is important for understanding how natural  
68 selection generates differences between sexes and species. If two beneficial traits are genetically  
69 correlated due to separate, physically linked loci, theory predicts that natural or sexual selection  
70 (e.g., through predation or female choice) will act to minimize recombination between the causal  
71 loci (Charlesworth and Charlesworth, 1976). It has been hypothesized that one solution to this  
72 problem might involve the evolution of chromosomal inversions that suppress recombination  
73 between two or more linked loci (Kirkpatrick and Barton, 2006). Alternatively, mutations at a  
74 single pleiotropic gene could cause correlated components of pigmentation and mating behavior  
75 to evolve simultaneously, although it is not likely, mechanistically, that a single mutation with  
76 generate adaptive changes in both pigmentation and behavior. Distinguishing between these  
77 genetic modes of phenotypic evolution requires, in part, high-resolution mapping of correlated  
78 traits.

79  
80 In the Oriental *Drosophila melanogaster* species group, male-specific wing spots are  
81 phylogenetically correlated with mating displays (Kopp and True, 2002; Figure 1A). Species  
82 with wing spots perform elaborate wing display dances during courtship, extending their wings  
83 laterally, turning their dorsal wing surfaces toward the female, and waving them up and down;  
84 species without wing spots lack display behavior (Kopp and True, 2002, Figure 1A,B).  
85 Correlated gains and losses of both traits have evolved repeatedly (Kopp and True, 2002, Figure  
86 1A). For example, in *D. elegans* and *D. gunungcola*, sibling species from this group that are  
87 estimated to have diverged 2-2.8 million years ago (Prud'homme *et al.*, 2006), *D. elegans* (Bock  
88 and Wheeler, 1972) males possess wing spots and perform wing displays, whereas *D.*

89 *gunungcola* (Sultana *et al.*, 1999) males lack both traits (Kopp and True, 2002; Prud'homme *et*  
90 *al.*, 2006; Yeh *et al.*, 2006; Figure 1B; Video 1; Video 2). Previously, Yeh *et al.*, (2006) and Yeh  
91 and True (2014) discovered that *D. elegans* and *D. gunungcola* can generate fertile F<sub>1</sub> hybrid  
92 female offspring in the lab and they performed interspecific crosses to study the genetic basis of  
93 wing spot and wing display divergence. Through quantitative trait locus (QTL) mapping, they  
94 showed that evolution of linked loci on the X chromosome contributed to divergence in both  
95 traits (Yeh *et al.*, 2006; Yeh and True, 2014). One QTL explaining wing spot size variation was  
96 linked to the pigmentation gene *yellow*, supporting the hypothesis that *yellow cis*-regulatory  
97 divergence contributes to wing pigmentation evolution (Wittkopp *et al.*, 2002a; Gompel *et al.*,  
98 2005; Prud'homme *et al.*, 2006). It remained unclear, however, whether the same or different  
99 loci on the X chromosome underlie correlated differences in wing spot and wing display between  
100 these species.

101  
102 To distinguish between these possibilities, we re-examined the genetic basis of wing spots and  
103 wing display divergence between *D. elegans* and *D. gunungcola*. Specifically, we (1) generated  
104 recombinant backcross progeny segregating for both traits, (2) assembled chromosome-length  
105 scaffolds of *D. elegans*, (3) used Multiplexed Shotgun Genotyping (MSG) (Andolfatto *et al.*,  
106 2011) to estimate recombination crossover positions across the genome, (4) generated  
107 quantitative measures of both wing spots and wing display behavior to estimate the effect size of  
108 loci contributing to divergence, and (5) generated advanced, recombinant introgressions on the X  
109 chromosome in an attempt to separate quantitative trait loci (QTL) underlying wing spots and  
110 wing display behavior. These experiments showed that a single locus on the X chromosome  
111 behaves like a genetic switch for wing spot divergence; however spotless males inheriting

112 introgressions of this region from *D. gunungcola* in a *D. elegans* genetic background performed  
113 wing displays like *D. elegans* males, indicating that the two traits are genetically separable.  
114 These findings suggest that wing spot and wing display behavior might have originally diverged  
115 independently. Consistent with this hypothesis, newly collected *D. gunungcola* strains from  
116 Indonesia appear to completely lack wing spots but retain the ability to perform wing displays.  
117 This observation suggests that the loss of wing spots occurred prior to the loss of wing display in  
118 the reference strain of *D. gunungcola* used in this study and in prior work.

## 119 **Materials and Methods**

120

### 121 *Fly stocks*

122

123 The *D. elegans* HK (Hong Kong) and *D. gunungcola* SK (Sukarami) lines used in this study were  
124 a gift from John True (Stony Brook University). Species stocks were kept on a 12 h light-dark  
125 cycle at 23°C on a University of Michigan “R food” diet containing molasses ([http://lab-  
126 express.com/flyfoodsupplies.htm#rfood](http://lab-express.com/flyfoodsupplies.htm#rfood)) (Wirtz and Semey, 1982). Maintaining these species on  
127 R food at high densities (50-100 flies per vial) allowed for the parental population to build up to  
128 thousands of flies to collect hundreds of virgins for interspecific crosses (see below). Neither *D.*  
129 *elegans* nor *D. gunungcola* pupate on the sides of the vial, so adults were flipped out when 3<sup>rd</sup>  
130 instar L3 larvae developed and Fisherbrand filter paper (cat# 09-790-2A) was added to the food  
131 to create pupation space.

132

### 133 *Generating hybrid progeny*

134

135 Virgin males and females of *D. elegans* and *D. gunungcola* were isolated upon eclosion and  
136 stored in groups of ten for one week on University of Michigan “M food”, which is the standard  
137 cornmeal diet from the Bloomington Drosophila Stock Center  
138 (<https://bdsc.indiana.edu/information/recipes/bloomfood.html>) with 20% higher agar content.  
139 Virgin males from *D. elegans* were crossed to virgin females from *D. gunungcola*, and virgin  
140 males from *D. gunungcola* were crossed to virgin females from *D. elegans* in groups of ten  
141 males and ten females to generate fertile F<sub>1</sub> female and sterile F<sub>1</sub> male hybrids. These crosses  
142 took ~3-4 weeks to produce hybrid progeny. The switch from R food to M food for interspecific  
143 crosses was necessary, because R food tended to accumulate condensation and bacterial growth  
144 much faster than M food when few flies occupied a vial. Since crossing *D. elegans* and *D.*  
145 *gunungcola* to generate F<sub>1</sub> hybrids tends to take several more weeks than within species crosses,  
146 the switch to M food diet allowed for maximum breeding time and the development of dozens of  
147 hybrid progeny. Once hybrid females eclosed from both interspecific cross directions, they were  
148 pooled into the same vial and aged for ten days. We did not keep track of F<sub>1</sub> hybrid female  
149 maternity, because previous work (Yeh and True, 2014) found no effect of F<sub>1</sub> hybrid maternity  
150 on trait means for wing spots and wing display in backcross populations. Multiple high-density  
151 groups of ~60 F<sub>1</sub> hybrid females were then backcrossed to ~60 virgin male *D. elegans* flies in  
152 individual vials on M food diet to create the *D. elegans* backcross recombinant population (724  
153 individuals). To create the *D. gunungcola* backcross recombinant population (241 individuals),  
154 groups of ~60 F<sub>1</sub> hybrid females were backcrossed to ~60 virgin male *D. gunungcola* flies in  
155 individual vials on M food diet; this backcross was less successful at producing recombinant  
156 progeny than the *D. elegans* backcross direction.  
157

158 *Behavioral assays*

159

160 Virgin *D. elegans* females were isolated upon eclosion, aged 10-20 days, and stored in groups of  
161 30-40 for courtship assays. F<sub>1</sub> hybrid and recombinant backcross males were isolated  
162 individually in M food vials using CO<sub>2</sub> upon eclosion for at least 5 days before each courtship  
163 assay. For each assay, a single individual male was gently aspirated into a custom built 70 mm  
164 diameter bowl arena that matches the specifications in Simon and Dickinson (2010). Next, a  
165 single virgin *D. elegans* female was aspirated into the chamber and videotaped for the next 20  
166 min, using a Canon VIXIA HF R500 camcorder mounted to Manfrotto (MKCOMPACTACN-  
167 BK) aluminum tripods. Videos were recorded between 09:00 and 16:00 at 23°C. *D. elegans*  
168 virgin females were used in all courtship assays in case any *D. elegans* female cues were  
169 necessary to elicit male wing display behavior. After each assay, both the male and female were  
170 aspirated back into an M food vial and left for up to 5 days, after which each male was frozen in  
171 individual 1.5 mL Eppendorf tubes for wing spot quantification (see Quantification of wing  
172 spots), genomic DNA (gDNA) extraction, and sequencing (see Library preparation and  
173 sequencing). All courtship videos (~900 total) are available here:  
174 [https://deepblue.lib.umich.edu/data/concern/data\\_sets/j098zb17n?locale=en](https://deepblue.lib.umich.edu/data/concern/data_sets/j098zb17n?locale=en).

175

176 *Quantification of wing display behavior*

177

178 F<sub>1</sub> hybrid and recombinant males from both backcross directions performed variable wing  
179 display behaviors during courtship as described previously (Yeh *et al.*, 2006; Yeh and True,  
180 2014). To generate quantitative measurements of wing display variation between individuals,



181 each courtship video was played using QuickTime (version 10.4) (Apple Inc., Cupertino, CA)  
182 software in a MacOS environment and digital screenshots were manually taken for each wing  
183 display bout, defined as a bilateral wing extension performed near the female (Supplementary  
184 Figure S1). Next, for each individual fly, wing display screenshots were compared to each other  
185 to identify the maximum wing display bout per fly, defined by comparing the distance between  
186 the tips of each wing relative to the center of the fly. These maximum wing display screenshots  
187 were then imported into ImageJ software (version 1.50i) (Wayne Rasband, National Institutes of  
188 Health, USA; <http://rsbweb.nih.gov/ij/>) to manually measure the “Maximum wing display angle”  
189 for F<sub>1</sub> hybrid and recombinant males. In ImageJ, each screenshot image was inverted using the  
190 “Find Edges” function to enhance the contrast between the arena background and the edges of  
191 the fly wings (Supplementary Figure S1). Next, the “Polygon Selections” tool was used to fit an  
192 ellipse around the fly body using the “Fit Ellipse” function (Supplementary Figure S1). A  
193 Macros function (Supplementary File S1) was then used to generate major and minor axes inside  
194 the ellipse to identify the center of the fly body (Supplementary Figure S1). Finally, the “Angle  
195 Tool” was used to measure the “Maximum wing display angle” centering the vertex at the  
196 intersection of the major and minor axes and extended from wing tip to wing tip (Supplementary  
197 Figure S1). “Maximum wing display angle” varied between ~50° and ~220° between backcross  
198 recombinant individuals.

199

#### 200 *Quantification of wing spots*

201

202 Since wing spots fully form ~24 h after eclosion in *D. elegans*, all parental male *D. elegans*, *D.*  
203 *gunungcola*, F<sub>1</sub> hybrids, and backcross recombinants were aged at least 7 days before being

204 frozen at -20C in 1.5 mL Eppendorf tubes. Next, using a 20 Gauge stainless steel syringe tip  
205 (Techcon) (cat# TE720100PK) the right wing of each fly was cut away from the thorax and  
206 placed on a glass microscope slide (Fisherbrand) (cat# 12-550-15) to image using either a Leica  
207 MZFLIII stereoscope equipped with a Leica DC480 microscope camera or a Canon EOS Rebel  
208 T6 camera equipped with a Canon MP-E 65 mm macro lens. Each camera was calibrated using  
209 an OMAX 0.1 mm slide micrometer to define pixel density in ImageJ software. JPEG images of  
210 wings were imported into ImageJ to measure wing spot size relative to total wing area (wing spot  
211 size / total wing area). Total wing area (wing length x wing width) was approximated using  
212 length and width proxies following methods described in Yeh and True (2014). Using the  
213 “Polygon Selections” tool, the margins of black pigmentation defining each “Wing spot size”  
214 was traced and the polygon area quantified in mm<sup>2</sup> using the “Measure” function. “Wing spot  
215 size” varied between 0 mm<sup>2</sup> (spotless) and 0.15 mm<sup>2</sup> between recombinant individuals.

216

### 217 *Library preparation and sequencing*

218

219 We estimated chromosome ancestry “genotypes” for 724 *D. elegans* backcross progeny and 241  
220 *D. gunungcola* backcross progeny with a single Multiplexed Shotgun Genotyping (MSG)  
221 (Andolfatto *et al.*, 2011) library using 965 barcoded adaptors following methods described in  
222 Cande *et al.*, (2012). In brief, to extract gDNA from all male backcross individuals, single flies  
223 were placed into individual wells of 96-well (Corning, cat# 3879) plates containing a single steel  
224 grinding bead in each well (Qiagen, cat# 69989). Eleven plates in total were prepared for 965  
225 individual gDNA extractions. gDNA was isolated and purified using the solid tissue extraction  
226 procedure from a Quick-DNA 96 Kit (Zymo, cat# D3012) and a paint shaker to homogenize

227 tissue. gDNA was tagmented using a hyperactive version of Tn5 transposase charged with  
228 annealed adaptor oligos following the methods described in Picelli *et al.* (2014). Unique  
229 barcoded adaptor sequences were ligated to each sample of tagmented gDNA with 14 cycles of  
230 PCR using OneTaq 2x Master Mix (NEB, cat# M0482S), and all samples were pooled into a  
231 single multiplexed sequencing library. Agencourt AMPure XP beads (Beckman Coulter, cat#  
232 A63881) were used to size select ~150-800 bp fragments and eluted in 35 uL of molecular grade  
233 water (Corning, cat# MT46000CI). The library was quantified by qPCR and sequenced in a  
234 single lane of Illumina HiSeq by the Janelia Quantitative Genomics Team.

235  
236 In addition to generating the backcross sequencing library, both *D. elegans HK* and *D.*  
237 *gunungcola SK* parental species were sequenced at 20x coverage using an Illumina MiSeq  
238 Reagent Kit (v.3, 600 cycle PE) to facilitate genome assembly. In brief, gDNA was extracted  
239 using a Quick-DNA Microprep Kit (Zymo, cat# D4074) from 10 pooled females for each species  
240 and quantified on a Qubit 2.0 (Invitrogen). These samples were sent to the University of  
241 Michigan DNA Sequencing Core to prepare 300 bp paired-end libraries, which were quantified  
242 by qPCR and sequenced in a single lane of Illumina MiSeq.

243  
244 *Genome assembly*

245  
246 In brief, Illumina reads from all 965 backcross recombinants were used to perform MSG on the  
247 Baylor College of Medicine *D. elegans* genome assembly (accession number:  
248 GCA\_000224195.2). Using custom scripts in R and Python  
249 (<https://github.com/masseyj/elegans>), the recombination fraction between the Baylor and MSG

250 contigs was calculated and plotted to manually tabulate joins and splits between newly  
251 assembled contigs. These new contigs were then used to assemble approximately chromosome  
252 length scaffolds in *D. elegans* (accession number: PRJNA590036) and partially assembled  
253 chromosomes in *D. gunungcola* (accession number: PRJNA590037).

254

### 255 *Marker generation with Multiplexed Shotgun Genotyping*

256

257 Following methods described previously (Andolfatto *et al.*, 2011; Cande *et al.*, 2012), we used  
258 the MSG software pipeline (<https://github.com/JaneliaSciComp/msg/tree/master/instructions>) to  
259 perform data parsing and chromosome ancestry estimation to generate markers for quantitative  
260 trait locus (QTL) analysis. In brief, using data from the Illumina backcross sequencing library  
261 (see Supplementary File S2 for the number of reads per individual), we mapped reads to the  
262 assembled *D. elegans* and *D. gunungcola* parental genomes to estimate chromosome ancestry for  
263 each backcross individual. We generated 3,425 and 3,121 markers for the *D. elegans* and *D.*  
264 *gunungcola* backcrosses, respectively (Supplementary Files S3, S4), for QTL analysis. PDFs of  
265 chromosomal breakpoints for each recombinant are available here:

266 [https://deepblue.lib.umich.edu/data/concern/data\\_sets/j098zb17n?locale=en](https://deepblue.lib.umich.edu/data/concern/data_sets/j098zb17n?locale=en).

267

268

### 269 *QTL analysis*

270

271 QTL analysis was performed using R/qtl (Broman *et al.*, 2003) in R for Mac version 3.3.3 (R  
272 Core Team 2018) in a MacOS environment. Ancestry data for both backcross directions were

273 imported into R/qtl using a custom script ([https://github.com/dstern/read\\_cross\\_msg](https://github.com/dstern/read_cross_msg)), which  
274 directly imports the conditional probability estimates produced by the Hidden Markov Model  
275 (HMM) of MSG (Andolfatto *et al.*, 2011). We performed genome scans with a single QTL  
276 model using the “scanone” function of R/qtl and Haley-Knott regression (Haley and Knott, 1992)  
277 for “Wing spot size” and “Maximum wing display angle”. Note, for “Wing spot size”, 68 and 42  
278 recombinants from the *D. elegans* and *D. gunungcola* backcross populations, respectively, were  
279 excluded from the QTL mapping because their wings were too damaged to quantify spot  
280 variation. Similarly, for “Maximum wing display angle”, 314 and 94 recombinants were  
281 excluded from the QTL mapping because these males did not perform any courtship behavior  
282 during the assay. Significance of QTL peaks at  $\alpha = 0.01$  was determined by performing 1000  
283 permutations of the data. Effect sizes for each QTL peak were individually estimated by  
284 comparing the mean “Wing spot size” or “Maximum wing display angle” between individuals  
285 that inherited either *D. elegans* or *D. gunungcola* alleles at each QTL peak position.

286  
287 Since we detected multiple QTL peaks on separate chromosomes for “Maximum wing display  
288 angle”, we tested for the presence of epistatic interactions using two methods: First, we  
289 performed two- and three-way ANOVAs comparing the effect of each QTL peak in multiple  
290 QTL peak genetic backgrounds and found no evidence of an interaction. For two-way ANOVAs,  
291 we tested for any statistically significant interactions for max wing display angles between two  
292 different QTL peaks in the *D. elegans* backcross. For three-way ANOVAs, we tested for any  
293 statistically significant interactions for max wing display angles between three different QTL  
294 peaks in the *D. gunungcola* backcross. Second, we performed genome-wide pairwise tests using  
295 the “scantwo” function of R/qtl and Haley-Knott regression to test for non-additive interactions

296 across all markers; LOD significance thresholds at  $\alpha = 0.05$ , 0.01, and 0.001 were determined by  
297 performing 1000 permutations of the data for each model (Supplementary Figure S2,  
298 Supplementary Tables S1,S2).

299

### 300 *Annotating the wing spot QTL interval*

301

302 To annotate genes within the ~440 Kbp fine-mapped wing spot locus, we performed nucleotide  
303 BLAST (BLASTn) (Johnson *et al.*, 2008) searches against the *D. melanogaster* genome (taxid:  
304 7227) using ~10 Kbp windows of assembled *D. elegans* chromosomal regions spanning the wing  
305 spot QTL interval. Using the “GBrowse” tool on Flybase (Thurmond *et al.*, 2018), we mapped  
306 regions of microsynteny to identify the orientation of each gene and exported the respective *D.*  
307 *melanogaster* coding region (CDS) FASTA sequences to align with the *D. elegans* X  
308 chromosome.

309

### 310 *In situ hybridization*

311

312 Fly genomic DNA (gDNA) was extracted from ten homogenized *D. elegans* and *D. gunungcola*  
313 females using a Quick-DNA Microprep Kit (Zymo, cat# D3021). The following forward and  
314 reverse primers were designed and synthesized by Integrated DNA Technologies (IDT) to PCR  
315 amplify 321 bp DNA templates targeting exon 5 of the *omb* locus in *D. elegans*: 5’-  
316 GCTGAGGATCCATTCGCTAGATTTG-3’ and 5’-GTTGTTGGAAGTACTAGAGTTGTTGGTG-  
317 3’, and *D. gunungcola*: 5’- GCTGAGGATCCATTCGCTAGATTTG-3’ and 5’-  
318 GTTGTGTTGGAAGTACTGGAGTTGTTGGTG-3’. Reverse primers were designed beginning with a

319 T7 RNA polymerase binding sequence (TAATACGACTCACTATAG) to facilitate *in vitro*  
320 transcription. Raw PCR products were then used to generate digoxigenin-labeled RNA probes  
321 using a T7 RNA *in vitro* transcription kit (Promega / Life Technologies). RNA was ethanol  
322 precipitated and resuspended in water to analyze on a Nanodrop. Each probe was stored at -20°C  
323 in 50% formamide before *in situ* hybridization.

324  
325 All tissues underwent primary dissection in PBS, fixed for 30 mins in 4% PFA, washed 3X in  
326 PBT and underwent secondary dissection in PBT, were then washed 2X in MeOH, and 2X in  
327 EtOH before being stored at -20C. Male *D. elegans* and *D. gunungcola* L3 wing discs were  
328 dissected first to validate that our *omb* probes detected an mRNA expression pattern similar to *D.*  
329 *melanogaster* (Grimm and Pflugfelder, 1996; Supplementary Figure S3). Next, pupal wings were  
330 dissected at 30 and 48 h after pupal formation (APF) to probe for *omb* mRNA. To prepare pupal  
331 wings, appropriately staged pupae underwent a primary dissection: were cut in half along the  
332 anterior-posterior axis using Astra Platinum Double Edge Razor Blades, and fat body was  
333 washed out of the pupal casing using a pipette and PBS prior to fixation. After fixation, pupal  
334 wings underwent a secondary dissection to pull off the cuticle surrounding each wing and then  
335 washed using the procedure described above. Finally, *in situ* hybridization was carried out as  
336 previously described (Vincent *et al.*, 2019). Briefly, we used an InsituPro VSi robot to rehydrate  
337 in PBT, fix in PBT with 4% PFA, and prehybridize in hybridization buffer for 1 hr at 65°C.  
338 Samples were then incubated with probe for 16 h at 65°C before washing with hybridization  
339 buffer and PBT. Samples were blocked in PBT with 1% bovine serum albumin (PBT+BSA) for  
340 2 hours. Samples were then incubated with anti-digoxigenin Fab fragments conjugated to  
341 alkaline phosphatase (Roche) diluted 1:6000 in PBT+BSA. After additional washes, color

342 reactions were performed by incubating samples with NBT and BCIP (Promega) until purple  
343 stain could be detected under a dissecting microscope. Samples were mounted in glycerol on  
344 microscope slides coated with poly-L-lysine and imaged at 10X magnification on a Leica  
345 DFC450C camera.

346

### 347 *Generating advanced recombinant introgressions on the X chromosome*

348

349 To try to isolate the QTL effects for “Wing spot size” and “Maximum wing display angle”  
350 localized to the X chromosome according to the *D. elegans* backcross experiment, F<sub>1</sub> hybrid  
351 females were generated using the procedures described above. F<sub>1</sub> hybrid females were then  
352 backcrossed to *D. elegans* males, and backcross males lacking wing spots were isolated to  
353 measure “Maximum wing display angles” during courtship as described above. This procedure  
354 was repeated for seven generations to generate BC3-BC9 backcross individuals: backcross  
355 females were backcrossed en masse to *D. elegans* males, and BC3 backcross males lacking wing  
356 spots were isolated to measure “Maximum wing display angles” during courtship with *D.*  
357 *elegans* virgins (and so on to BC9). At each generation, an attempt was made to create stable  
358 introgression lines of advanced recombinant males lacking wing spots, but all failed to produce  
359 offspring, suggesting that *D. gunungcola* X-linked loci might also contain hybrid sterility factors.  
360 After seven generations of backcrossing, gDNA from all backcross males lacking wing spots was  
361 extracted and sequenced for MSG as described above. Backcross males lacking wing spots from  
362 BC4-BC9 were homozygous for *D. elegans* genomic regions across all autosomes but varied for  
363 the amount of *D. gunungcola* genome regions on the X chromosome.

364



365 *Introgression of black body color alleles from D. gunungcola into D. elegans*

366

367 In the *D. gunungcola* backcross, QTL mapping for wing spot size revealed QTL peaks linked to  
368 Muller Element C and E when spotless recombinants were excluded from the analysis  
369 (Supplementary Figure S4; Supplementary Table S3). The Muller Element E QTL peak is  
370 located near the *ebony* gene, which appears to contribute to variation in body color between *D.*  
371 *elegans* and *D. gunungcola* (unpublished data). We therefore reasoned that introgressing dark  
372 body color from *D. gunungcola* into *D. elegans* would introgress the Muller Element E QTL  
373 peak underlying wing spot size differences. After six generations of backcrossing dark brown  
374 female recombinants with *D. elegans* males, we crossed dark brown male and female  
375 recombinants together to create black offspring homozygous for the introgressed region. We then  
376 performed MSG on a single, dark black introgression line and found that it was homozygous for  
377 ~1.5 Mb of *D. gunungcola* alleles linked near the Muller Element E QTL peak (Supplementary  
378 Figure S4A,B).

379

380 Observing and collecting wild *D. gunungcola* in Indonesia

381

382 Throughout early July 2018, *D. elegans* and *D. gunungcola* were recorded performing courtship  
383 in East Java, Indonesia on *Brugmansia sp.* flowers using Canon VIXIA HF R500 camcorders  
384 mounted to Manfrotto (MKCOMPACTACN-BK) aluminum tripods. Both species were observed  
385 in sympatry on flowers near Coban Rondo Waterfall in Batu, Batu City, East Java, Indonesia (-  
386 7.884985, 112.477311). After observing courtship, males and females were captured using a  
387 mouth pipette and gently aspirated into glass vials containing standard fly media (glucose, corn

388 meal, yeast extract, and agar). Isofemale lines of *D. gunungcola* from Bumiaji District (Batu  
389 City, East Java Province, Indonesia) were established in the laboratory on standard fly media at  
390 24°C temperature.

391  
392 *Statistics*  
393  
394 Statistical tests were performed in R for Mac version 3.3.3 (R Core Team 2018) using Student's  
395 t-test (two-tailed) to test for statistically significant effects of pairwise comparisons of continuous  
396 data with normally distributed error terms. For tests comparing more than two groups, ANOVAs  
397 were performed with *post hoc* Tukey HSD for pairwise comparisons adjusted for multiple  
398 comparisons. See "QTL analysis" methods for statistical tests used during QTL mapping.

399

## 400 **Results and Discussion**

401  
402 *X-linked sequence divergence contributed to wing spot and wing display divergence*

403  
404 *D. elegans* males perform elaborate wing display dances (Video 1) in front of females during  
405 courtship, displaying the presence of darkly pigmented wing spots (Figure 1B), whereas its  
406 sibling species, *D. gunungcola*, lacks wing spots (Yeh *et al.*, 2006; Prud'homme *et al.*, 2006) and  
407 wing displays (Figure 1B; Video 2). Despite these differences in sexual traits, *D. elegans* and *D.*  
408 *gunungcola* can mate and form viable F<sub>1</sub> hybrids in the lab (Yeh *et al.*, 2006; Yeh and True,  
409 2014). Sequence divergence on the X chromosome has previously been implicated in the  
410 divergence of wing spots and wing display behavior (Yeh *et al.*, 2006; Yeh and True, 2014). To

411 confirm this effect of the X-chromosome, we quantified variation in wing spot size and wing  
412 display behavior in F<sub>1</sub> hybrid males from reciprocal crosses between *D. elegans* and *D.*  
413 *gunungcola*. These F<sub>1</sub> hybrids inherited their X chromosome from either *D. elegans* or *D.*  
414 *gunungcola* (whichever species was their mother) and autosomes from both species. Consistent  
415 with prior work, F<sub>1</sub> hybrid males inheriting the X chromosome from *D. elegans* mothers (F<sub>1</sub>E)  
416 possessed wing spots, whereas F<sub>1</sub> hybrid males inheriting the X chromosome from *D.*  
417 *gunungcola* mothers (F<sub>1</sub>G) did not (Figure 1C,D). These wing spots of F<sub>1</sub>E males were smaller,  
418 however, than the wing spots seen in *D. elegans* (Figure 1D, test, P = 0.02). Differences in wing  
419 display behavior were also apparent between F<sub>1</sub>E (Video 3) and F<sub>1</sub>G hybrids (Video 4), which is  
420 also consistent with prior work (Yeh *et al.*, 2006; Yeh and True, 2014). More specifically, we  
421 found that although both F<sub>1</sub> hybrids performed wing displays during courtship, F<sub>1</sub>E hybrids  
422 tended to open their wings more widely than F<sub>1</sub>G hybrids during display performance (Figure  
423 1C). We quantified variation in this wing display trait between F<sub>1</sub> hybrids by measuring the  
424 maximum bilateral wing display angles (Figure 1C) during courtship (see Methods). We found  
425 that F<sub>1</sub>E hybrids performed wing displays comparable to *D. elegans* males (Figure 1E, post-hoc  
426 Tukey HSD, P = 0.6), whereas F<sub>1</sub>G males showed, on average, lower display angles (Figure 1E,  
427 post-hoc Tukey HSD, P = 7.1 x 10<sup>-5</sup>). Together these data confirm that divergence of one or  
428 more loci on the X chromosome contribute to divergence in wing spot size and wing display  
429 behavior between *D. elegans* and *D. gunungcola*.

430

431 *Evolution of at least three loci contribute to wing spot divergence*

432

433 To identify the location of X-linked (as well as autosomal) loci contributing to divergence in  
434 wing spot size, we quantified wing spot size variation in 656 recombinant males produced by  
435 backcrossing F<sub>1</sub> hybrid females to *D. elegans* males and 199 recombinant males produced by  
436 backcrossing F<sub>1</sub> hybrid females to *D. gunungcola* males. These backcross males showed a range  
437 of wing spot sizes (Figure 2A). Using Multiplexed Shotgun Genotyping (MSG) (Andolfatto *et*  
438 *al.*, 2011), we inferred the allele most likely inherited from the F<sub>1</sub> mother (*D. elegans* or *D.*  
439 *gunungcola*) for each genomic position in each recombinant. We then performed quantitative  
440 trait locus (QTL) mapping for wing spot size and identified a single, highly significant QTL peak  
441 on the X chromosome (Figure 2B and Table 1). In both backcross directions, variation linked to  
442 this wing spot QTL peak explained almost all of the difference in wing spot size between *D.*  
443 *elegans* and *D. gunungcola* (Figure 2C). Repeating the QTL mapping after excluding  
444 recombinant individuals lacking wing spots, however, allowed us to identify additional QTLs of  
445 smaller effect on Muller Elements C (chromosome 2R in *D. melanogaster*) and E (chromosome  
446 3R in *D. melanogaster*) in the *D. gunungcola* (but not *D. elegans*) backcross population  
447 (Supplementary Figure S4A; Supplementary Table S3). Observing these QTL only in the *D.*  
448 *gunungcola* backcross populations suggests that they are caused by recessive *D. gunungcola*  
449 alleles, which are never homozygous in the *D. elegans* backcross population. Introgressing the  
450 QTL region on Muller Element E from *D. gunungcola* into *D. elegans* through 5 generations of  
451 backcrossing (Supplementary Figure S4C) reduced the size of wing spots (Supplementary Figure  
452 S4D, E). This region includes the *ebony* gene, which has previously been shown to be able to  
453 inhibit the development of dark pigments in *D. melanogaster* (Wittkopp *et al.*, 2002b). Crossing  
454 this introgression line to *D. elegans* masked most of the reduction in spot size (Supplementary  
455 Figure 4D, E), consistent with the *D. gunungcola* QTL allele being recessive to the *D. elegans*

456 allele. Taken together, these data indicate that the majority of wing spot divergence between *D.*  
457 *elegans* and *D. gunungcola* maps to a single, large-effect QTL on the X chromosome, but that  
458 wing spot size is also influenced by loci on Muller Elements C and E.

459

460 *A 440 kb locus behaves like a genetic switch for wing spots*

461

462 To further refine the X-linked QTL, we more closely examined the genotypes and phenotypes of  
463 recombinants with inferred crossover positions immediately flanking the wing spot QTL peak  
464 (Figure 2D, Supplementary Figure S5). Doing so allowed us to identify a ~440 kb region  
465 containing a QTL that acts like a genetic switch controlling the presence or absence of the wing  
466 spot (Figure 2D, Supplementary Figure S5). This region includes 15 genes (Figure 2E) and  
467 notably excludes the X-linked pigmentation gene, *yellow*, which has previously been suggested  
468 to contribute to wing spot development and evolution (Wittkopp *et al.*, 2002a; Gompel *et al.*,  
469 2005; Prud'homme *et al.*, 2006; Yeh *et al.*, 2006; Arnoult *et al.*, 2013; Yeh and True, 2014;  
470 Supplementary Figure 6). One of these 15 genes is *optomotor-blind (omb)* (Figure 2E), which  
471 encodes a T-box-containing transcription factor (Pflugfelder *et al.*, 1992a; Pflugfelder *et al.*,  
472 1992b) that has previously been implicated in pigmentation patterning (Thompson, 1959; Kopp  
473 and Duncan, 1997), pigmentation evolution (Brisson *et al.*, 2004), and distal wing patterning  
474 (Grim and Pflugfelder, 1996). In *D. melanogaster*, gain- and loss-of-function *omb* alleles cause  
475 expansion and contraction of abdominal pigmentation bands, respectively (Kopp and Duncan,  
476 1997), and variation in abdominal pigmentation in *D. polymorpha* is strongly associated with  
477 polymorphisms at the *omb* locus (Brisson *et al.*, 2004).

478

479 Although we identified two nonsynonymous protein coding changes between *D. elegans* and *D.*  
480 *gunungcola* (Supplementary File S5), *omb* is required for the development of many structures  
481 throughout the body (Pflugfelder, 2009); we, therefore, reasoned that genetic divergence in *omb*  
482 would be more likely to affect its expression than its protein function (Stern and Orgogozo,  
483 2008). To look for differences in *omb* expression between *D. elegans* and *D. gunungcola* that  
484 might affect wing spot development, we used *in situ* hybridization to detect *omb* mRNA in the  
485 developing wing of both species (Figure 2F). In *D. melanogaster*, *omb* is expressed in a broad  
486 stripe that overlaps the wing pouch region in larval L3 wing discs (Grimm and Pflugfelder,  
487 1996). *omb* expression in the wing pouch is required for distal wing development, as  
488 demonstrated by *D. melanogaster omb* hypomorphs that show disrupted distal wing tip  
489 development in adults (Grimm and Pflugfelder, 1996). We hypothesized, therefore, that  
490 differences in *D. elegans* and *D. gunungcola omb* expression patterning during pupal wing  
491 development might prefigure changes in wing spot pigmentation observed in adult males, similar  
492 to the changes in *wingless* expression shown to prefigure wing spots in *D. guttifera* (Werner *et*  
493 *al.*, 2010). Consistent with the expression of *omb-lacZ* in pupal wings of *D. melanogaster*  
494 (Álamo Rodríguez *et al.*, 2004), we detected *omb* mRNA in the wing hinge and distal wing tip  
495 30 h after puparium formation (APF) in *D. elegans* and *D. gunungcola* (Figure 2F). We were  
496 unable to identify any consistent differences in the *omb* expression patterns between *D. elegans*  
497 and *D. gunungcola* although it is possible that we may not have detected subtle differences in  
498 expression patterns. In addition, it is possible that the changes in *omb* protein sequence  
499 contribute to differences in wing spot patterning, or that other genes in the minimal mapped  
500 interval are the true cause of the difference in wing spot patterning.

501

502 *Evolution at multiple loci contributed to wing display divergence*

503

504 To identify loci contributing to divergence in wing display behavior, we quantified variation in  
505 maximum wing display angles (see Methods) in 410 *D. elegans* and 147 *D. gunungcola*  
506 backcross recombinant males, again observing a range of phenotypes (Figure 3A). We identified  
507 multiple significant QTL contributing to variation in wing display (Figure 3B; Table 1). In the *D.*  
508 *elegans* backcross, we mapped a QTL on the X chromosome that co-localized with the wing spot  
509 QTL (Figure 3B,E; Table 1). We also mapped a QTL on Muller Element B (chromosome 2L in  
510 *D. melanogaster*) (Figure 3B; Table 1). In the *D. gunungcola* backcross, we mapped QTLs on  
511 the X chromosome as well as Muller Elements B and E (Figure 2E; Table 1). These differences  
512 in QTL peaks mapped using backcrosses to *D. elegans* and *D. gunungcola* suggest that *D.*  
513 *elegans* and *D. gunungcola* alleles affecting wing display behavior are recessive and/or interact  
514 epistatically with divergent sites elsewhere in the genome.

515

516 To test for epistatic interactions contributing to wing display divergence, we performed a two-  
517 dimensional genome scan to search for non-additive interactions across all markers in both  
518 backcross directions and found no significant interactions (Supplementary Figure S2;  
519 Supplementary Tables S1,S2). We also tested for evidence of non-additive interactions among  
520 the wing display QTL peaks themselves by performing two- and three-way ANOVAs in the *D.*  
521 *elegans* and *D. gunungcola* backcrosses, respectively, and found no evidence of significant  
522 interactions between loci (Figure 3C). Instead, each wing display QTL peak appears to behave  
523 approximately additively, with *D. gunungcola* alleles contributing to lower maximum wing  
524 display angles (Figure 3C). Surprisingly, the effect of the X-linked QTL on wing display angle in

525 the *D. gunungcola* backcross in multiple genetic backgrounds was similar to the estimated effect  
526 size of the X-linked QTL in the *D. elegans* backcross (compare panels in Figure 3C) despite the  
527 much lower LOD score of the X-linked QTL in the *D. gunungcola* backcross population (Figure  
528 3B; Table 1). We suggest that while the detected QTL in the *D. gunungcola* backcross appear to  
529 interact additively with each other, undetected QTL elsewhere in the genome are likely masking  
530 the X-effect in the *D. gunungcola* backcross map. While the purpose of the two-dimensional  
531 genome scan (Supplementary Figure S2; Supplementary Tables S1,S2) was to detect these  
532 effects, our sample size is likely too small to identify small-effect epistatic interactions.

533

534 *Males lacking wing spots perform normal wing displays*

535

536 While it remains unclear which gene evolved to cause the majority of wing spot divergence, fine-  
537 mapping the locus controlling the presence or absence of the wing spot allowed us to test  
538 whether the locus that turns off wing spots in *D. gunungcola* also affects wing display behavior.  
539 To perform this test, we introgressed *D. gunungcola* alleles causing a loss of the wing spot into  
540 *D. elegans* by repeated backcrossing (see Methods). We recovered three introgression lines  
541 lacking wing spots and found that all three lines had inherited the ~440 kb region observed in  
542 mapping experiments to act like a genetic switch controlling wing spot development (Figure  
543 4A,B), independently confirming the causal role of the switch region in wing spot divergence.  
544 We noticed, however, that several advanced recombinants developed a wing spot “shadow”  
545 (Figure 4B), possibly due to the effects of other *D. elegans* alleles affecting wing spot  
546 development. We next asked whether the spotless advanced recombinants performed wing  
547 displays with lower wing display angles than *D. elegans* males. Surprisingly, we found that all



548 advanced recombinants inheriting the *D. gunungcola* allele eliminating the wing spot performed  
549 wing displays indistinguishable from *D. elegans* males during courtship (Figure 4B,C; Videos 5-  
550 7). Thus, the loci controlling the wing spot and courtship behavior are genetically separable.

551  
552 The repeated co-evolution of male-specific wing spots and wing display behavior in multiple  
553 species (Kopp and True, 2002) combined with the presence of overlapping QTL for these traits  
554 on the X chromosome (Yeh *et al.*, 2006; Yeh and True, 2014; and this study) suggested that a  
555 single pleiotropic gene might be contributing to the evolution of both traits. The finding that *D.*  
556 *elegans* introgression lines lacking a wing spot performed a normal wing display argues against  
557 this hypothesis and indicates instead that these two traits arose independently between this  
558 species pair. To further investigate how these divergent traits might have evolved, we observed  
559 courtship behavior in a wild population of *D. gunungcola* in Indonesia; to the best of our  
560 knowledge, all prior studies of *D. gunungcola* pigmentation and courtship used the one  
561 previously available lab strain (Sultana *et al.*, 1999). Surprisingly, we found that all *D.*  
562 *gunungcola* males observed in the wild population sampled lacked wing spots (Supplementary  
563 Figure 7) but performed wing displays (Videos 8,9), confirming that these are genetically distinct  
564 traits. The wing displays performed by these flies appeared to show a lower maximum wing  
565 extension angle than *D. elegans* (Videos 1,10), similar to the wing display behavior seen in F1  
566 hybrids between *D. elegans* and *D. gunungcola* with *D. gunungcola* mothers (Video 4). Analysis  
567 of new lab strains founded by flies captured from this *D. gunungcola* population showed similar  
568 male courtship behavior in the lab as observed on flowers (Video 11). We therefore conclude  
569 that although the absence of wing spots appears fixed in *D. gunungcola*, the absence of wing  
570 display behavior does not. It remains to be seen whether the lack of wing display in the strain

571 collected in 1999 resulted from polymorphic alleles segregating within *D. gunungcola* or a  
572 change that occurred since this strain was brought into the laboratory. Assuming that the loss of  
573 the wing spot and wing display behavior are derived traits in *D. gunungcola* (Prud'homme *et al.*,  
574 2006), these observations suggest that the loss of male-specific wing spots predates the loss of  
575 male wing display behavior in this species.

576

## 577 **Conclusions**

578

579 Male-specific wing spots and wing display behavior have co-evolved in *Drosophila* multiple  
580 times (Kopp and True, 2002). By studying the genetic basis of these divergent traits between *D.*  
581 *elegans* and *D. gunungcola*, we showed that the changes in wing spot and wing display were not  
582 caused by changes in a single, pleiotropic gene despite overlapping QTL (Yeh *et al.*, 2006; Yeh  
583 and True, 2014). Rather, we found that distinct loci contribute to divergence in each of these  
584 traits, with the genetic architecture of divergent wing behavior being more complex than that of  
585 the divergent wing spot pigmentation. Both traits were affected by divergent gene(s) located on  
586 the X chromosome that are in physical linkage, however, causing alleles of these distinct loci to  
587 be co-inherited. This linkage might have facilitated the coordinated evolution of these traits.

588

589 The specific genes contributing to divergence in wing spot and wing display remain unknown,  
590 but *optomotor-blind* is a strong candidate for the X-linked gene contributing to the loss of the  
591 wing spot. Introgression lines and additional sampling of *D. gunungcola* from a wild population  
592 also showed that the loss of wing spots and wing display are not inexorably linked: in both cases,  
593 males lacking wing spots still performed a wing display behavior. Coordinated evolution of

594 morphological and behavioral traits such as these is often observed in animal species, but it is  
595 often unclear which change evolved first. In this case at least, it seems that the divergence of  
596 morphology preceded the divergence of behavior.

597

## 598 **Acknowledgements**

599

600 We thank members of the Wittkopp, Stern, and Rebeiz labs for helpful discussions. For fly  
601 strains, we thank John True (Stony Brook University). For guidance throughout the *in situ*  
602 hybridization work, we thank Mark Rebeiz (University of Pittsburgh). For arranging the Material  
603 Transfer Agreement for *D. gunungcola* and *D. elegans*, we thank Nia Kurniawan (University of  
604 Brawijaya, Indonesia); for hosting us in Indonesia, we thank Karuniawan Wicaksono (University  
605 of Brawijaya, Indonesia); for assistance with field collections, we thank Hagus Tarno (University  
606 of Brawijaya, Indonesia). Funding: University of Michigan, Department of Ecology and  
607 Evolutionary Biology, Peter Olaus Okkelberg Research Award, National Institutes of Health  
608 (NIH) training grant T32GM007544, and Howard Hughes Medical Institute Janelia Graduate  
609 Research Fellowship to J.H.M.; NIH R01 GM089736 and 1R35GM118073 to PJW.

610

## 611 **Author Contributions**

612 Jonathan H. Massey, Conceptualization, Data curation, Formal analysis, Funding acquisition,  
613 Validation, Investigation, Visualization, Methodology, Writing—original draft, Writing—review  
614 and editing; Gavin R. Rice, Formal analysis, Validation, Investigation, Methodology, Writing—  
615 review and editing; Anggun Firdaus, Investigation, Methodology, Writing—review and editing;  
616 Chi-Yang Chen, Investigation, Methodology; Shu-Dan Yeh, Funding acquisition, Investigation,

617 Methodology; David L. Stern, Supervision, Funding acquisition, Conceptualization, Data  
618 curation, Formal analysis, Investigation, Visualization, Writing—original draft, Project  
619 administration, Writing—review and editing; Patricia J. Wittkopp, Supervision, Funding  
620 acquisition, Conceptualization, Data curation, Formal analysis, Investigation, Visualization,  
621 Writing—original draft, Project administration, Writing—review and editing.

622

623

624

625

## 626 **References**

627

628 Andolfatto, P., Davison, D., Erezyilmaz, D., Hu, T. T., Mast, J., Sunayama-Morita, T., &  
629 Stern, D. L. (2011). Multiplexed shotgun genotyping for rapid and efficient  
630 genetic mapping. *Genome Research*, 21(4), 610-617.

631

632 Álamo Rodríguez, D., Felix, J. T., & Díaz-Benjumea, F. J. (2004). The role of the T-box gene  
633 optomotor-blind in patterning the Drosophila wing. *Developmental Biology*, 268(2), 481-  
634 492.

635

636 Arnoult, L., Su, K. F., Manoel, D., Minervino, C., Magriña, J., Gompel, N., & Prud'homme, B.  
637 (2013). Emergence and diversification of fly pigmentation through evolution of a gene  
638 regulatory module. *Science*, 339(6126), 1423-1426.

639

- 640 Bock, I. R., and Wheeler, M. R. (1972) The *Drosophila melanogaster* species group.  
641 University of Texas Publication 7213, 1–102.  
642
- 643 Brisson, J. A., Templeton, A. R., & Duncan, I. (2004). Population genetics of the  
644 developmental gene *optomotor-blind (omb)* in *Drosophila polymorpha*: evidence  
645 for a role in abdominal pigmentation variation. *Genetics*, 168(4), 1999-2010.  
646
- 647 Broman KW, Wu H, Sen S, Churchill GA (2003) R/qtl: QTL mapping in experimental  
648 crosses. *Bioinformatics*, 19: 889–890.  
649
- 650 Broman, K. W., & Sen, S. (2009). A Guide to QTL Mapping with R/qtl (Vol. 46). New  
651 York: Springer.  
652
- 653 Cande, J., Andolfatto, P., Prud'homme, B., Stern, D. L., & Gompel, N. (2012). Evolution  
654 of multiple additive loci caused divergence between *Drosophila yakuba* and *D.*  
655 *santomea* in wing rowing during male courtship. *PLoS One*, 7(8), e43888.  
656
- 657 Charlesworth, D., & Charlesworth, B. (1976). Theoretical genetics of Batesian mimicry  
658 II. Evolution of supergenes. *Journal of Theoretical Biology*, 55(2), 305-324.  
659
- 660 Endler, J. A. (1991). Variation in the appearance of guppy color patterns to guppies and  
661 their predators under different visual conditions. *Vision Research*, 31(3), 587-608.  
662

- 663 Gompel, N., Prud'homme, B., Wittkopp, P. J., Kassner, V. A., & Carroll, S. B. (2005).  
664 Chance caught on the wing: cis-regulatory evolution and the origin of pigment  
665 patterns in *Drosophila*. *Nature*, 433(7025), 481.  
666
- 667 Gray, S. M., & McKinnon, J. S. (2007). Linking color polymorphism maintenance and  
668 speciation. *Trends in Ecology & Evolution*, 22(2), 71-79.  
669
- 670 Grimm, S. and Pflugfelder, G. O. (1996). Control of the gene *optomotor-blind* in  
671 *Drosophila* wing development by *decapentaplegic* and *wingless*. *Science*, 271,  
672 1601-04.  
673
- 674 Haley CS, Knott SA (1992). A simple regression method for mapping quantitative trait  
675 loci in line crosses using flanking markers. *Heredity*, 69: 315–324.  
676
- 677 Johnson, M., Zaretskaya, I., Raytselis, Y., Merezuk, Y., McGinnis, S., & Madden, T. L.  
678 (2008). NCBI BLAST: a better web interface. *Nucleic Acids Research*,  
679 36(suppl\_2), W5-W9.  
680
- 681 Kirkpatrick, M., & Barton, N. (2006). Chromosome inversions, local adaptation and  
682 speciation. *Genetics*, 173(1), 419-434.  
683
- 684 Kopp, A., & Duncan, I. (1997). Control of cell fate and polarity in the adult abdominal  
685 segments of *Drosophila* by *optomotor-blind*. *Development*, 124(19), 3715-3726.

- 686
- 687 Kopp, A., & True, J. R. (2002). Evolution of male sexual characters in the oriental  
688 *Drosophila melanogaster* species group. *Evolution & Development*, 4(4), 278-  
689 291.
- 690
- 691 Kronforst, M. R., Young, L. G., Kapan, D. D., McNeely, C., O'Neill, R. J., & Gilbert, L.  
692 E. (2006). Linkage of butterfly mate preference and wing color preference cue at  
693 the genomic location of wingless. *Proceedings of the National Academy of*  
694 *Sciences*, 103(17), 6575-6580.
- 695
- 696 Küpper, C., Stocks, M., Risse, J. E., dos Remedios, N., Farrell, L. L., McRae, S. B., ... &  
697 Kitaysky, A. S. (2016). A supergene determines highly divergent male  
698 reproductive morphs in the ruff. *Nature Genetics*, 48(1), 79.
- 699
- 700 Lamichhaney, S., Fan, G., Widemo, F., Gunnarsson, U., Thalmann, D. S., Hoepfner, M.  
701 P., ... & Chen, W. (2016). Structural genomic changes underlie alternative  
702 reproductive strategies in the ruff (*Philomachus pugnax*). *Nature Genetics*, 48(1),  
703 84.
- 704
- 705 Lindholm, A., & Breden, F. (2002). Sex chromosomes and sexual selection in poeciliid  
706 fishes. *The American Naturalist*, 160(S6), S214-S224.
- 707
- 708 Loxton, R. G. (1979). On display behaviour and courtship in the praying mantis

709 *Ephestiasula amoena* (Bolivar). *Zoological Journal of the Linnean Society*, 65(1),  
710 103-110.  
711  
712 McKinnon, J. S., & Pierotti, M. E. (2010). Colour polymorphism and correlated  
713 characters: genetic mechanisms and evolution. *Molecular Ecology*, 19(23), 5101-5125.  
714  
715 Merrill, R. M., Rastas, P., Martin, S. H., Melo, M. C., Barker, S., Davey, J., ... & Jiggins,  
716 C. D. (2019). Genetic dissection of assortative mating behavior. *PLoS Biology*,  
717 17(2), e2005902.  
718  
719 Pflugfelder, G. O., Roth, H. and Poeck, B. (1992a). A homology domain shared between  
720 *Drosophila optomotor-blind* and mouse Brachyury is involved in DNA binding.  
721 *Biochem. Biophys. Res. Comm.*, 186, 918-25.  
722  
723 Pflugfelder, G. O., Roth, H., Poeck, B., Kersher, S., Schwarz, H., Jonschker, B. and  
724 Heisenberg, M. (1992b). The lethal (1) *optomotor-blind* gene of *Drosophila*  
725 *melanogaster* is a major organizer of optic lobe development: Isolation and  
726 characterization of the gene. *Proc. Nat. Acad. Sci.*, 89, 1199-1203.  
727  
728 Pflugfelder, G. O. (2009). omb and circumstance. *Journal of neurogenetics*, 23(1-2), 15-33.  
729  
730 Picelli, S., Björklund, Å. K., Reinius, B., Sagasser, S., Winberg, G., & Sandberg, R.  
731 (2014). Tn5 transposase and tagmentation procedures for massively scaled



- 732 sequencing projects. *Genome Research*, 24(12), 2033-2040.
- 733
- 734 Prud'Homme, B., Gompel, N., Rokas, A., Kassner, V. A., Williams, T. M., Yeh, S. D., ...  
735 & Carroll, S. B. (2006). Repeated morphological evolution through cis-regulatory  
736 changes in a pleiotropic gene. *Nature*, 440(7087), 1050-1053.
- 737
- 738 R Core Team. 2013. R: A Language and Environment for Statistical Computing. Available from:  
739 <http://www.r-project.org/>.
- 740
- 741 Simon, J. C., & Dickinson, M. H. (2010). A new chamber for studying the behavior of  
742 *Drosophila*. *Plos One*, 5(1), e8793.
- 743
- 744 Sinervo, B., Miles, D. B., Frankino, W. A., Klukowski, M., & DeNardo, D. F. (2000).  
745 Testosterone, endurance, and Darwinian fitness: natural and sexual selection on  
746 the physiological bases of alternative male behaviors in side-blotched  
747 lizards. *Hormones and Behavior*, 38(4), 222-233.
- 748
- 749 Stern, D. L., & Orgogozo, V. (2008). The loci of evolution: how predictable is genetic  
750 evolution?. *Evolution*, 62(9), 2155-2177.
- 751
- 752 Sultana, F., Kimura, M. T., & Toda, M. J. (1999). Anthophilic *Drosophila* of the *elegans*  
753 species-subgroup from Indonesia, with description of a new species (Diptera:  
754 Drosophilidae). *Entomological Science*, 2, 121-126.

755

756 Thomas, J. W., Cáceres, M., Lowman, J. J., Morehouse, C. B., Short, M. E., Baldwin, E.

757 L., ... & Martin, C. L. (2008). The chromosomal polymorphism linked to variation

758 in social behavior in the white-throated sparrow (*Zonotrichia albicollis*) is a

759 complex rearrangement and suppressor of recombination. *Genetics*, 179(3), 1455-

760 1468.

761

762 Thompson, P. E. (1959). *Drosophila*. Info. Service 33, 99

763

764 Thurmond, J., Goodman, J. L., Strelets, V. B., Attrill, H., Gramates, L. S., Marygold, S.

765 J., ... & Kaufman, T. C. (2018). FlyBase 2.0: the next generation. *Nucleic Acids*

766 *Research*, 47(D1), D759-D765.

767

768 Vincent, B. J., Rice, G. R., Wong, G. M., Glassford, W. J., Downs, K. I., Shastay, J. L., ... &

769 Rebeiz, M. (2019). An atlas of transcription factors expressed in male pupal terminalia of

770 *Drosophila melanogaster*. *G3: Genes, Genomes, Genetics*, g3-400788.

771

772 Werner, T., Koshikawa, S., Williams, T. M., & Carroll, S. B. (2010). Generation of a novel wing

773 colour pattern by the Wingless morphogen. *Nature*, 464(7292), 1143.

774

775 Wirtz, R. A. and Semey, H. G. (1982). The *Drosophila* kitchen - equipment, media preparation,

776 and supplies. *Drosophila Information Service*. 58, 176-180.

777

- 778 White, T. E., Zeil, J., & Kemp, D. J. (2015). Signal design and courtship presentation  
779 coincide for highly biased delivery of an iridescent butterfly mating  
780 signal. *Evolution*, 69(1), 14-25.
- 781
- 782 Wittkopp, P. J., Vaccaro, K., & Carroll, S. B. (2002a). Evolution of *yellow* gene  
783 regulation and pigmentation in *Drosophila*. *Current Biology*, 12(18), 1547-1556.
- 784
- 785 Wittkopp, P. J., True, J. R., & Carroll, S. B. (2002b). Reciprocal functions of the  
786 *Drosophila yellow* and *ebony* proteins in the development and evolution of  
787 pigment patterns. *Development*, 129(8), 1849-1858.
- 788
- 789 Yeh, S. D., Liou, S. R., & True, J. R. (2006). Genetics of divergence in male wing  
790 pigmentation and courtship behavior between *Drosophila elegans* and *D.*  
791 *gunungcola*. *Heredity*, 96(5), 383.
- 792
- 793 Yeh, S. D., & True, J. R. (2014). The genetic architecture of coordinately evolving male  
794 wing pigmentation and courtship behavior in *Drosophila elegans* and *Drosophila*  
795 *gunungcola*. *G3: Genes, Genomes, Genetics*, 4(11), 2079-2093.
- 796
- 797

798 **Figure Legends**

799

800 **Figure 1 Wing pigmentation and wing display behavior in *D. elegans*, *D. gunguncola*, and**  
801 **F<sub>1</sub> hybrids**

802  
803 (A) Phylogeny of the “Oriental” *Drosophila melanogaster* species group adapted from Kopp and  
804 True (2002) and Prud’homme *et al.* (2006). Plus (+) signs indicate species possess wing spots  
805 and/or wing displays, and minus (-) signs indicates wing spots and/or wing displays are absent.  
806 (B) Males in *D. elegans* (left) possess wing spots and perform bilateral wing display behaviors in  
807 front of females during courtship (Video 1). Wing spots and wing displays are absent in *D.*  
808 *gunungcola* males (right) (Video 2). (C) F<sub>1</sub> hybrid males inheriting their X chromosome from *D.*  
809 *elegans* mothers (F<sub>1</sub>E, left) possess wing spots and perform wing display behavior like *D.*  
810 *elegans* (Video 3). F<sub>1</sub> hybrid males inheriting their X chromosome from *D. gunungcola* mothers  
811 (F<sub>1</sub>G, right) are spotless and perform wing displays with low bilateral wing angles (Video 4). (D)  
812 Quantification of wing spot size (see Methods) in male *D. elegans* and F<sub>1</sub>E. Wing spots are  
813 larger in *D. elegans* than F<sub>1</sub>E (Student’s t-test;  $t = -2.8057$ ;  $df = 11.43$ ;  $P = 0.017$ ; two-tailed). (E)  
814 Quantification of maximum bilateral wing display angles during courtship (see Methods) in male  
815 *D. elegans* and F<sub>1</sub> hybrids. F<sub>1</sub>G hybrids showed lower maximum wing display angles than *D.*  
816 *elegans* and F<sub>1</sub>E hybrids (One-way ANOVA:  $F_{2,71} = 20.92$ ;  $P < 7.18 \times 10^{-8}$ ; post-hoc Tukey HSD  
817 was significant between *D. elegans* and F<sub>1</sub>G:  $P < 2.0 \times 10^{-7}$  and between F<sub>1</sub>E and F<sub>1</sub>G:  $P < 7.1 \times$   
818  $10^{-5}$ ). Gray triangles represent individual replicates.

819  
820 **Figure 2 QTL analysis, effect plots, and *in situ* hybridization for wing pigmentation**  
821 **divergence**

822

823 (A) Wing spots vary in size and shape in *D. elegans* and *D. gunungcola* backcross recombinants.  
824 Wing spots were traced (pink) and quantified relative to proxies for total wing area (length x  
825 width) using ImageJ software (see Methods). (B) Wing spot QTL map for the *D. elegans* (red)  
826 and *D. gunungcola* (blue) backcross. LOD (logarithm of the odds) is indicated on the y-axis. The  
827 x-axis represents the physical map of Muller Elements X, B, C, D, E, and F based on the *D.*  
828 *elegans* assembled genome (see Methods). While *D. elegans* and *D. gunungcola* have six  
829 separate chromosomes (Yeh *et al.*, 2006; Yeh and True, 2014), they are each syntenic with the  
830 *D. melanogaster* genome accordingly: X = X, B = 2L, C = 2R, D = 3L, E = 3R, F = 4. Individual  
831 SNP markers are indicated with black tick marks along the x-axis. Horizontal red and blue lines  
832 mark  $p = 0.01$  for the *D. elegans* and *D. gunungcola* backcross, respectively. (C) Effect plots for  
833 the X chromosome QTL peak from the *D. elegans* backcross (left) and *D. gunungcola* backcross  
834 (right). (D) *D. elegans* and *D. gunungcola* backcross recombinants containing X chromosome  
835 breakpoints immediately flanking the wing spot QTL peak were aligned to compare the effects  
836 of each on wing pigmentation. Regions in red represent *D. elegans* linked loci, and regions in  
837 blue represent *D. gunungcola* linked loci. Recombinants possessing *D. elegans* loci to the left of  
838 ~10.32 Mbp are spotless, while recombinants possessing *D. elegans* loci to the right of ~10.74  
839 Mbp possess dark wing spots. (E) Two recombinants define the wing spot locus to a ~440 Kbp  
840 region containing 15 candidate genes. *omb* is the strongest wing pigmentation candidate gene  
841 given evidence from prior work (see Results and Discussion). (F) *In situ* hybridization of *D.*  
842 *elegans* and *D. gunungcola* pupal wings probed for *omb* mRNA (purple) at 30 h after pupal  
843 formation (APF) (see Supplementary Figure S8 for additional replicates). Gray triangles  
844 represent individual replicates.  
845

846 **Figure 3 QTL analysis and effect plots for wing display divergence**

847

848 (A) Maximum wing display angles varied in *D. elegans* and *D. gunungcola* backcross

849 recombinants. Maximum wing display angles were quantified by measuring the angle between

850 each wing tip using ImageJ software (see Methods). (B) Maximum wing display QTL map for

851 the *D. elegans* (red) and *D. gunungcola* (blue) backcross. LOD is indicated on the y-axis.

852 Individual SNP markers are indicated with black tick marks along the x-axis. Horizontal red and

853 blue lines mark  $P = 0.01$  for the *D. elegans* and *D. gunungcola* backcross, respectively. (C)

854 Effect plots for the X chromosome and Muller Element B QTL peaks from the *D. elegans*

855 backcross (left) and for the X, Muller Element B, and E QTL peaks from the *D. gunungcola*

856 backcross (right). No epistatic interactions were detected between QTLs (see Methods) (Two-

857 way ANOVA:  $F_{1,402} = 0.146$ ;  $P = 0.70$  for the *D. elegans* backcross; Three-way ANOVA:  $F_{1,137}$

858  $= 0.050$  (X:B),  $0.034$  (X:E),  $1.75$  (B:E),  $0.799$  (X:B:E);  $P = 0.82$  (X:B),  $0.86$  (X:E),  $0.19$  (B:E),

859  $0.37$  (X:B:E) for the *D. gunungcola* backcross). Gray triangles represent individual replicates.

860

861 **Figure 4 *D. elegans* males possessing the *D. gunungcola* wing spot locus perform normal**  
862 **wing displays**

863

864 (A) Multiplexed Shotgun Genotyping (MSG) (Andolfatto *et al.*, 2011) was used to estimate

865 genome-wide ancestry assignments for three introgression lines generated by repeatedly

866 backcrossing the *D. gunungcola* wing spot QTL region into a *D. elegans* genetic background

867 (see Methods). The posterior probability that a region is homozygous for *D. elegans* (red) or *D.*

868 *gunungcola* (blue) ancestry is plotted along the y-axis. The dotted line marks the location of the

869 fine-mapped wing spot region (Figure 2D,E; Table 1). (B). None of the introgressions possessed  
870 dark wing spots (although a light wing spot “shadow” is visible). (B,C) Every introgression  
871 performed max wing display angles indistinguishable from *D. elegans* males (One-way  
872 ANOVA:  $F_{3,42} = 0.449$ ;  $P = 0.72$ ). Gray triangles represent individual replicates.

873

#### 874 **Supplementary Figure S1 ImageJ procedure for measuring maximum wing display angles**

875

876 Screenshots of each wing display were captured for every recombinant courtship video. The  
877 maximum wing display bout was identified for each fly by quickly comparing screenshots that  
878 varied in wing display angles (from wing tip to wing tip) and picking by eye the display with the  
879 largest angle. Next, for each fly, the maximum wing display angle was quantified in ImageJ by  
880 using 1) Find Edges function, 2) polygon tool to Fit Ellipse around the fly body, 3) Ellipse  
881 Macros (Supplementary File S1) to fit the major and minor axes of the ellipse, and 4) draw  
882 Angle tool, fitting the angle vertex at the major and minor axes intersection to calculate the wing  
883 display angle from wing tip to wing tip.

884

#### 885 **Supplementary Figure S2 LOD scores estimated from a two-dimensional, two QTL scan of** 886 **maximum wing display angles**

887

888 (A) For the *D. elegans* backcross, the Interaction  $LOD_i$ , which estimates the likelihood that the  
889 effect of genotypes at one marker depend on genotypes at another, is displayed in the upper left  
890 triangle; the Full  $LOD_f$ , which estimates the effect of both additive and non-additive interactions  
891 between genotypes (see Supplementary Table S2 for LOD thresholds), is displayed in the lower

892 right triangle (Broman *et al.*, 2003). The color scale on the right indicates LOD values for LODi  
893 (left) and LODf (right). (B) For the *D. gunungcola* backcross, the Interaction LODi is displayed  
894 in the upper left triangle; the Full LODf (see Supplementary Table S3 for LOD thresholds) is  
895 displayed in the lower right triangle. The color scale on the right indicates LOD values for LODi  
896 (left) and LODf (right).

897

898 **Supplementary Figure S3 *In situ* hybridization of *D. elegans* and *D. gunungcola* L3 wing**  
899 **discs**

900

901 Male *D. elegans* (left) and *D. gunungcola* (right) L3 wing discs were dissected and stained with  
902 probes targeting *omb* mRNA.

903

904 **Supplementary Figure S4 Effects of Muller Element E on wing spot divergence**

905

906 (A) Wing spot QTL map for *D. elegans* (red) and *D. gunungcola* (blue) backcross recombinants.  
907 Note, all recombinant individuals that lacked wing spots were removed from this QTL analysis  
908 to identify loci contributing to wing spot size variation independent of wing spot presence or  
909 absence. LOD (logarithm of the odds) is indicated on the y-axis. The x-axis represents the  
910 physical map of Muller Elements X, B, C, D, E, and F based on the *D. elegans* assembled  
911 genome (see Methods). Individual SNP markers are indicated with black tick marks along the x-  
912 axis. Horizontal red and blue lines mark  $P = 0.01$  for the *D. elegans* and *D. gunungcola*  
913 backcross, respectively. (B) Images illustrating *D. elegans* and *D. gunungcola* body color  
914 differences. (C) Multiplexed Shotgun Genotyping (MSG) (Andolfatto *et al.*, 2011) was used to



915 estimate genome-wide ancestry assignments for a single introgression line generated by  
916 repeatedly backcrossing *D. gunungcola* into a *D. elegans* genetic background (see Methods). The  
917 posterior probability that a region is homozygous for *D. elegans* (red) or *D. gunungcola* (blue)  
918 ancestry is plotted along the y-axis. (D) Representative wing spot images of *D. elegans* and *D.*  
919 *gunungcola* species parents, the introgression line genotyped in (B), and an F<sub>1</sub> heterozygote  
920 generated by crossing *D. elegans* females to introgression males. (E) Quantification of wing spot  
921 size differences between each genotype. Results of Tukey HSD *post hoc* tests following one-way  
922 ANOVA are shown (One-way ANOVA  $F_{2,88} = 78.6$ ;  $P < 2.0 \times 10^{-16}$ ; post-hoc Tukey HSD was  
923 significant between *D. elegans* and Introgression:  $P < 1.0 \times 10^{-7}$ , *D. elegans* and F1  
924 Introgression/*D. elegans* heterozygote:  $P = 0.02$ , and Introgression and Introgression/*D. elegans*  
925 heterozygote:  $P < 1.0 \times 10^{-7}$ . Gray triangles represent individual replicates.

926

927

928

929

### 930 **Supplementary Figure S5 Fine-mapping the wing spot locus**

931

932 *D. elegans* and *D. gunungcola* backcross recombinants containing X chromosome breakpoints  
933 immediately flanking the wing spot QTL peak were aligned to compare the effects of each on  
934 wing pigmentation. Regions in red represent *D. elegans* linked loci, and regions in blue represent  
935 *D. gunungcola* linked loci. All recombinants possessing *D. gunungcola* loci to the right of  
936 ~10.95 Mbp are spotless.

937

938 **Supplementary Figure S6 Effects of the *yellow* gene on wing spot size and wing display**  
939 **behavior in *D. elegans***

940  
941 (A) Loss-of-function *D. elegans HK yellow* mutants develop smaller wing spots than *D. elegans*  
942 *HK* wild-type males (Student's t-test;  $t = 4.7759$ ;  $df = 15.28$ ;  $P = 0.0002$ ; two-tailed) and (B)  
943 show lower maximum wing display angles (Student's t-test;  $t = 3.0294$ ;  $df = 50.82$ ;  $P = 0.004$ ;  
944 two-tailed).

945  
946 **Supplementary Figure S7 Male wings from new *D. gunungcola* isolates**

947  
948 Male *D. gunungcola* from five newly collected isofemale lines in Indonesia do not develop wing  
949 spots.

950  
951 **Supplementary Figure S8 *In situ* hybridization of *D. elegans* and *D. gunungcola* pupal**  
952 **wings probed for *omb* mRNA**

953  
954 *omb* mRNA (purple) was probed at 30 and 48 h after pupal formation (APF) in both males and  
955 females.

956  
957  
958 **Videos**

959  
960 **Video 1 *D. elegans HK* wing display behavior**

- 961
- 962 **Video 2 *D. gunungcola* SK courtship and copulation**
- 963
- 964 **Video 3 F<sub>1</sub>E wing display behavior**
- 965
- 966 **Video 4 F<sub>1</sub>G wing display behavior**
- 967
- 968 **Video 5 Introgression 1 wing display behavior**
- 969
- 970 **Video 6 Introgression 2 wing display behavior**
- 971
- 972 **Video 7 Introgression 3 wing display behavior**
- 973
- 974 **Video 8 *D. gunungcola* wing display behavior at Coban Rondo Waterfall in East Java,**
- 975 **Indonesia (Version 1)**
- 976
- 977 **Video 9 *D. gunungcola* wing display behavior at Coban Rondo Waterfall in East Java,**
- 978 **Indonesia (Version 2)**
- 979
- 980 **Video 10 *D. elegans* wing display behavior in Tumpang, Indonesia**
- 981
- 982 **Video 11 *D. gunungcola* (Batu City, Indonesia) wing display behavior in the laboratory**

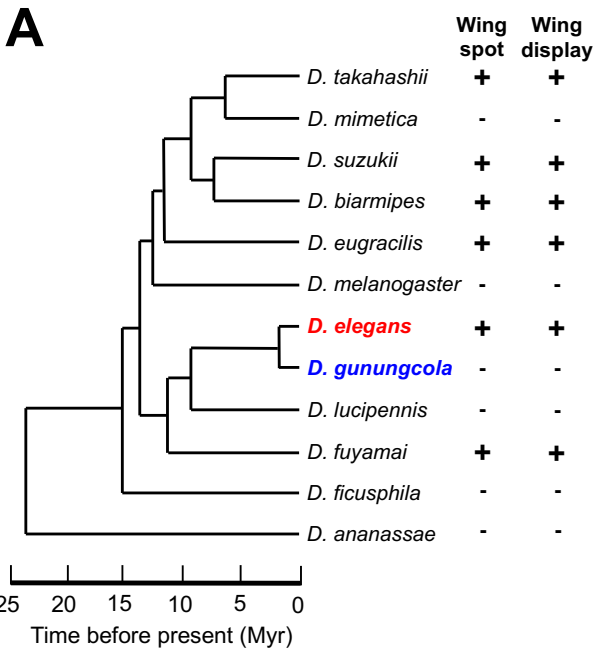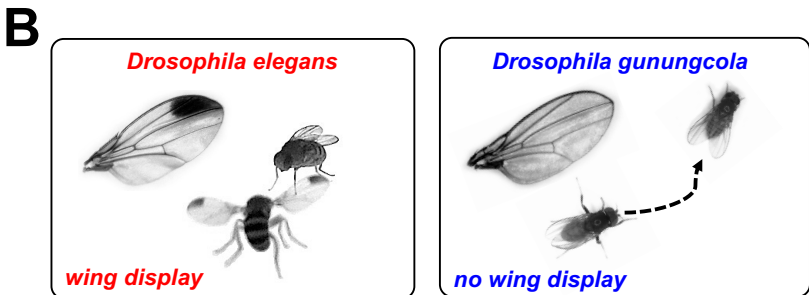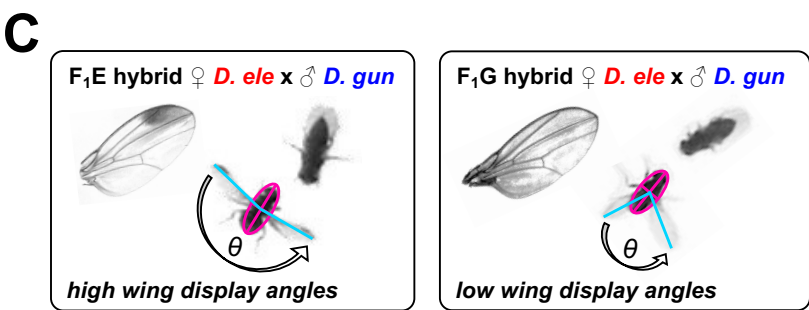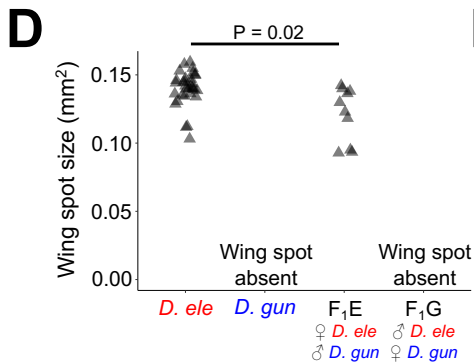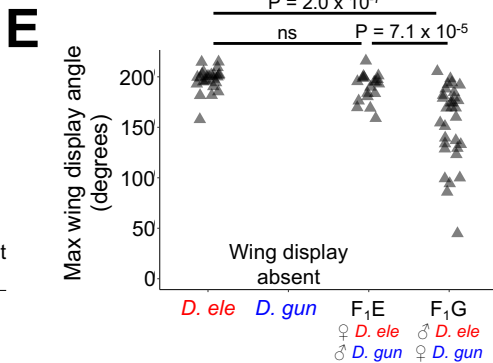

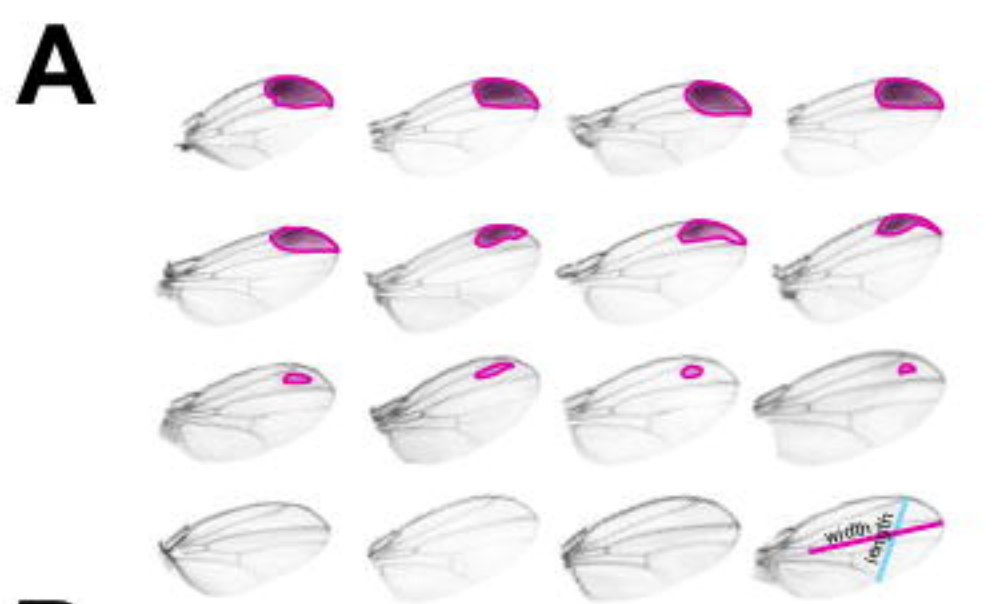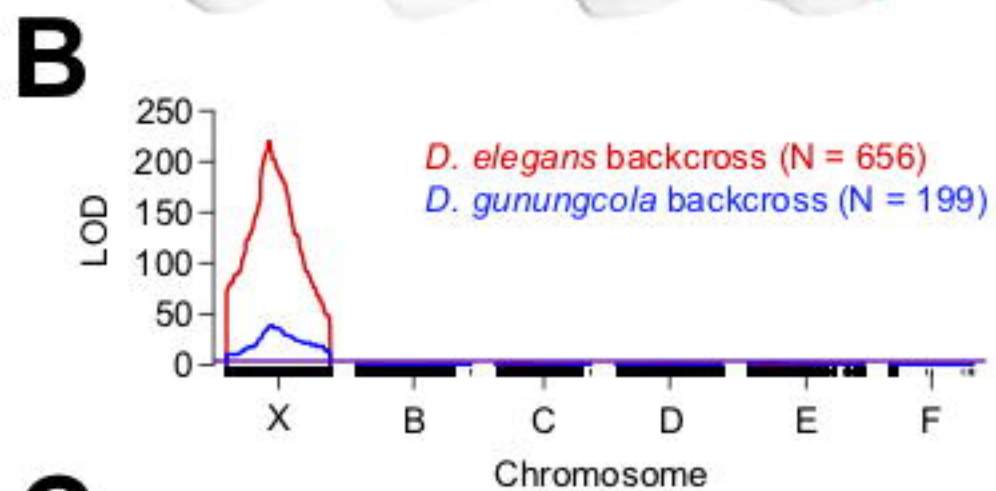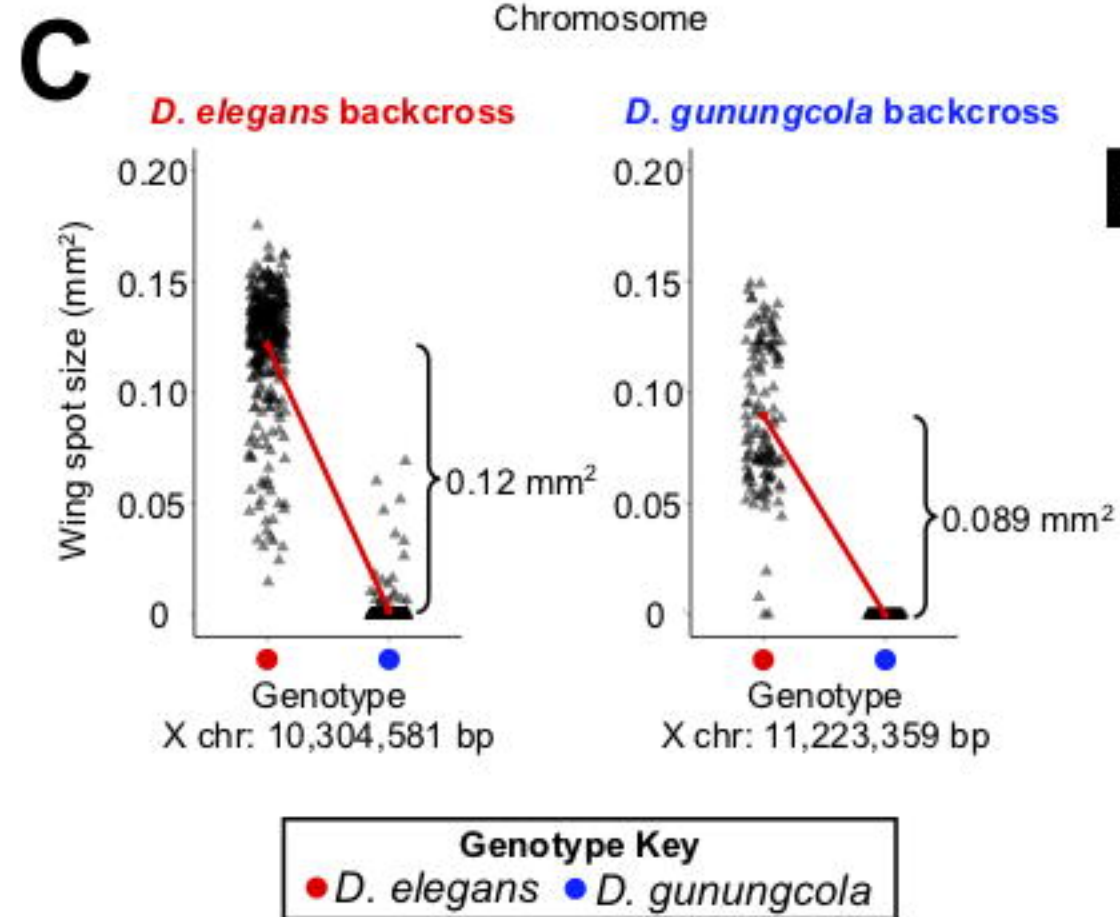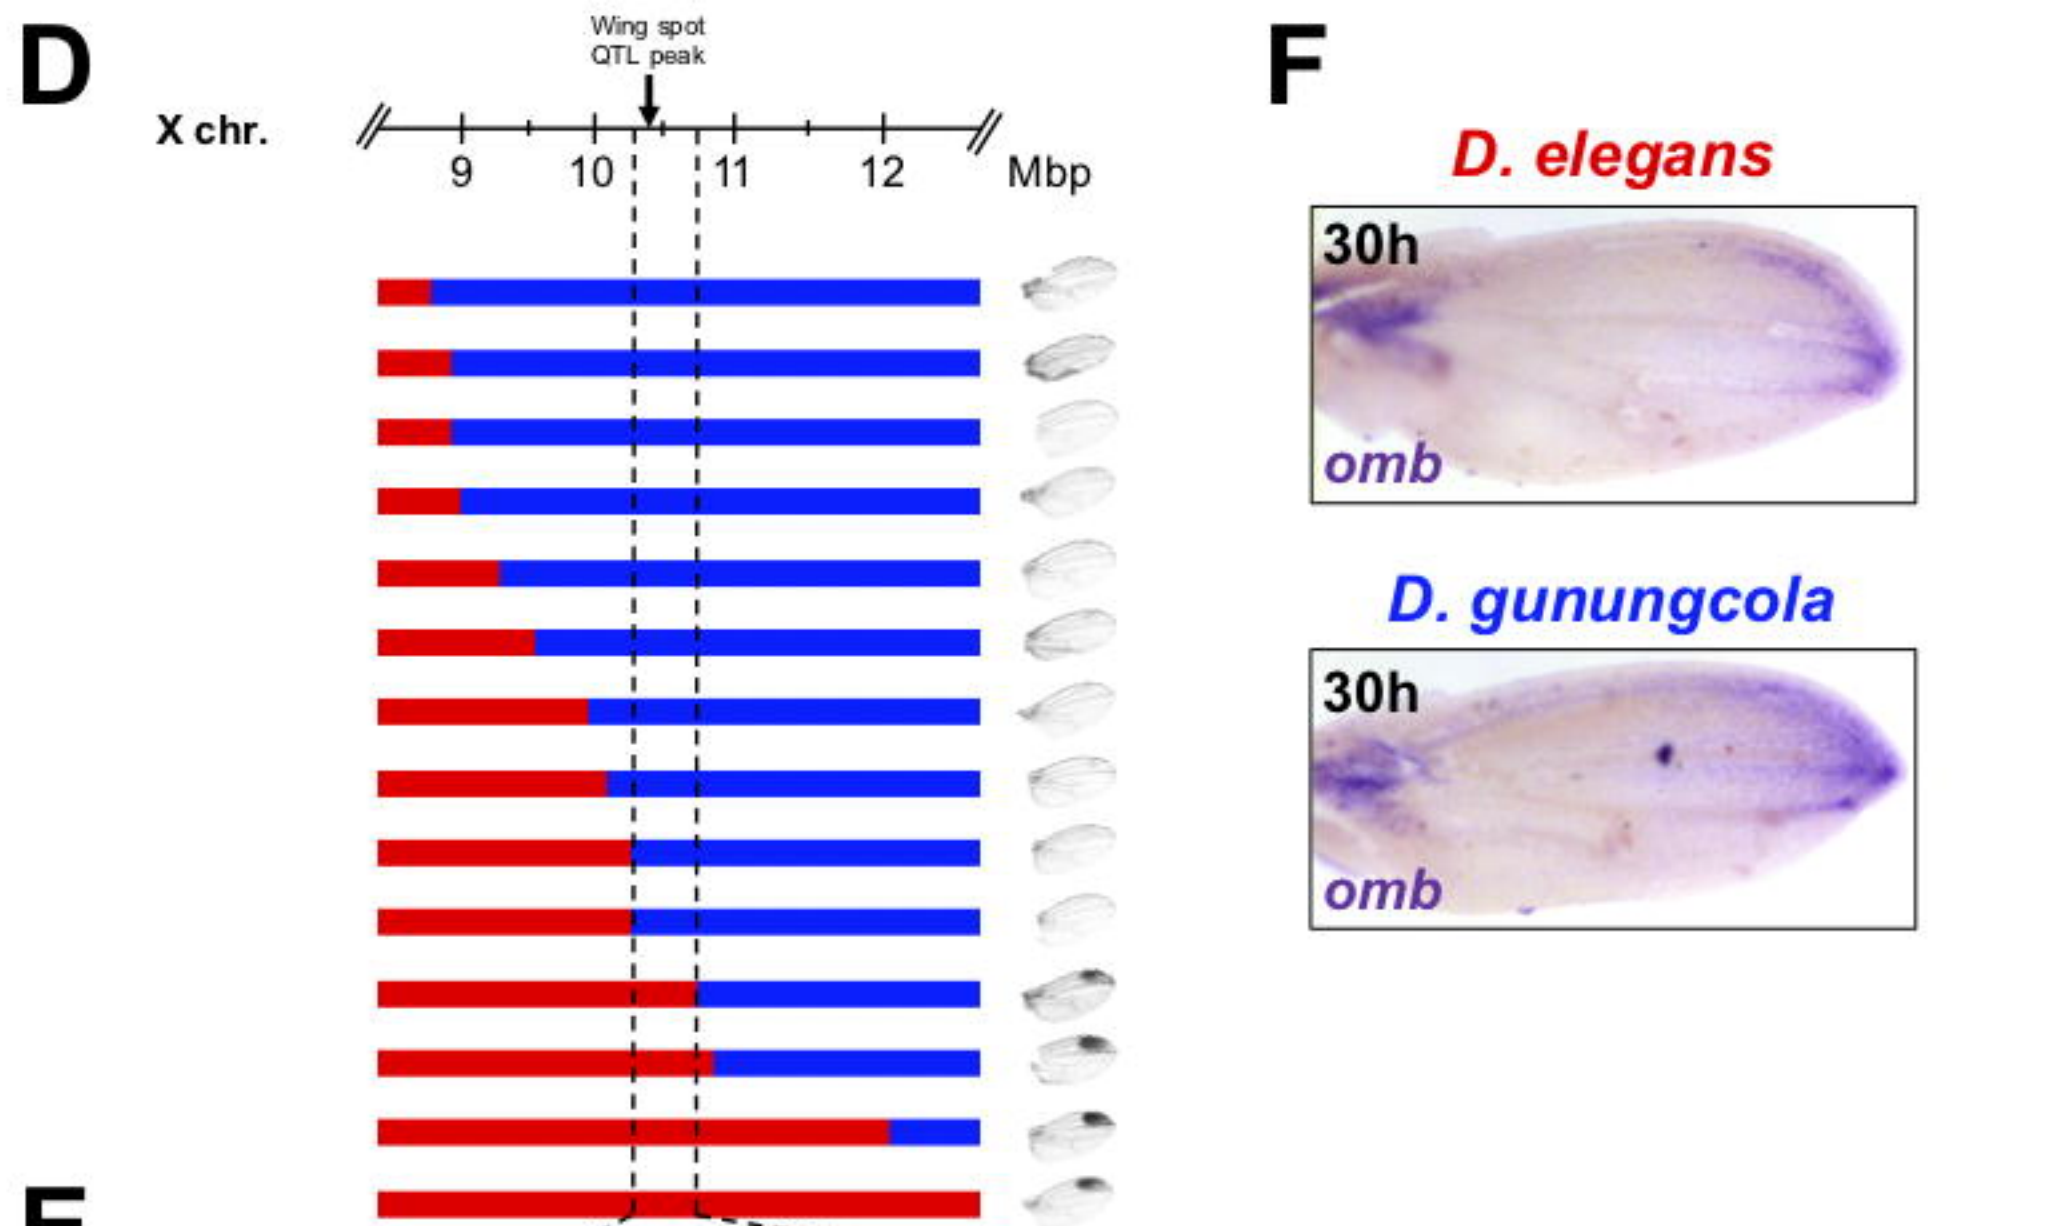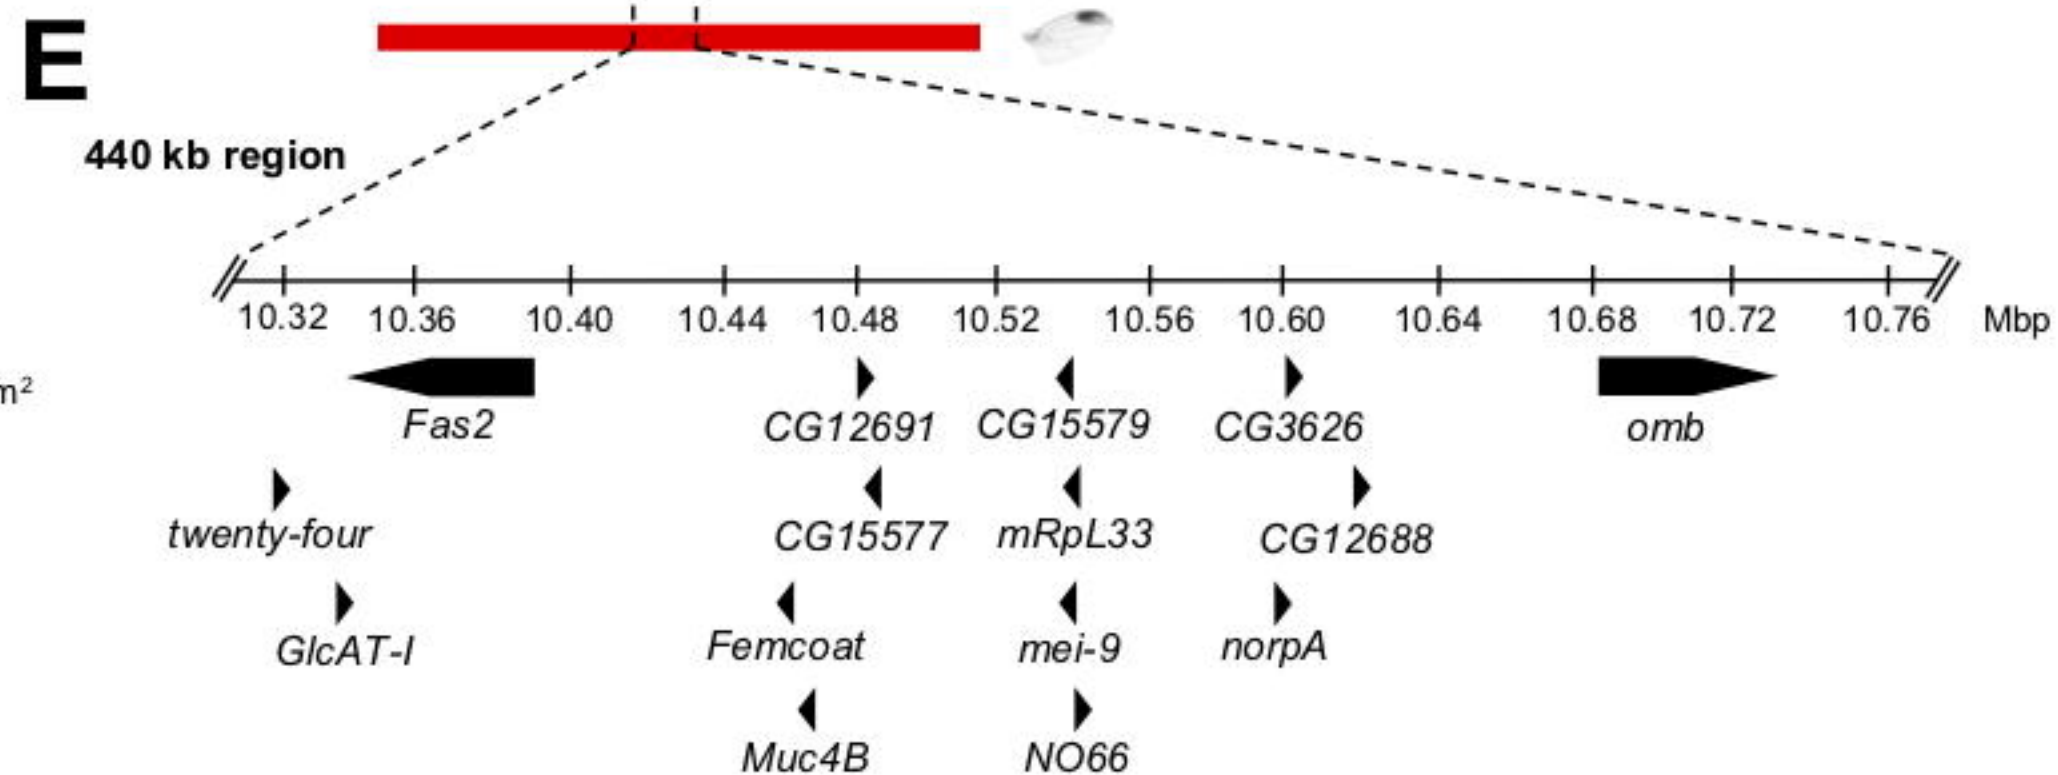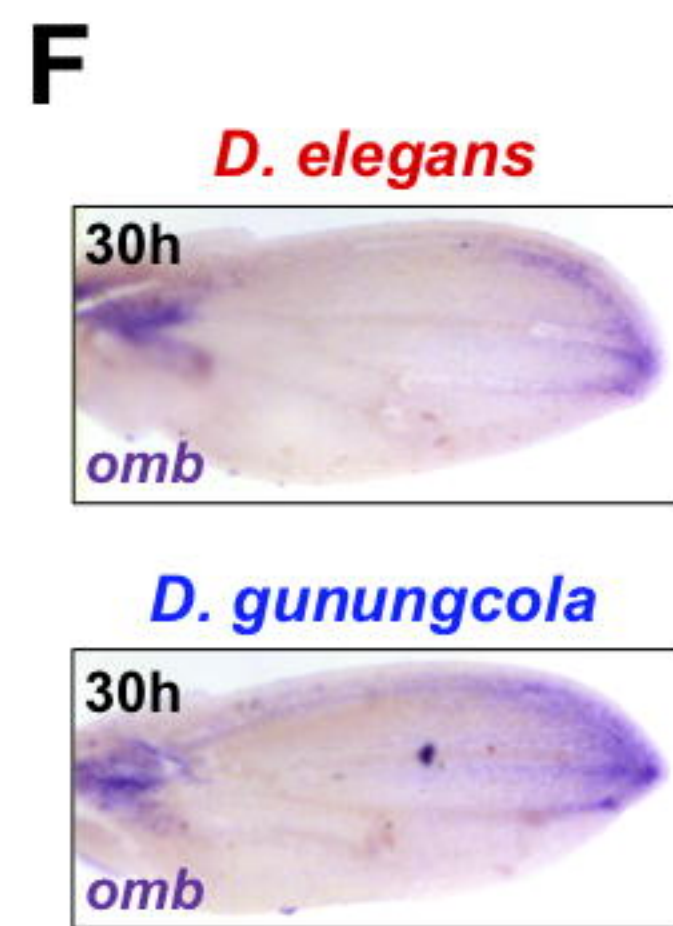

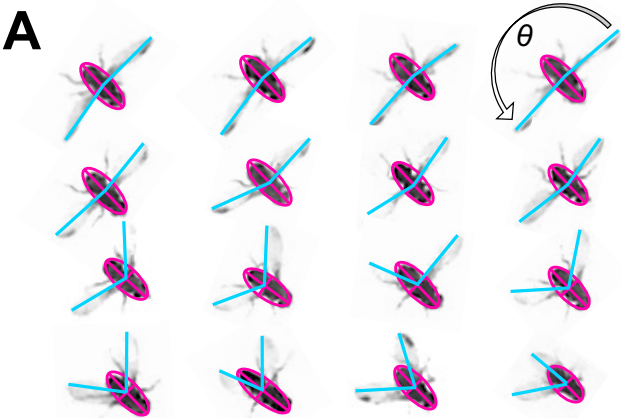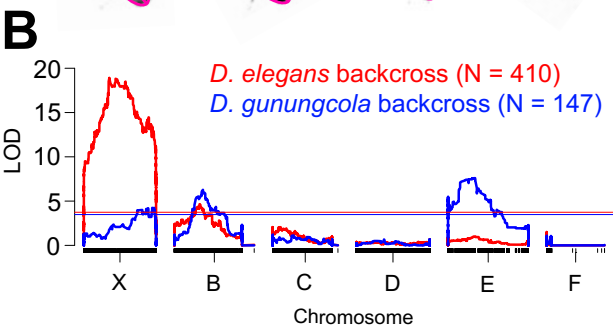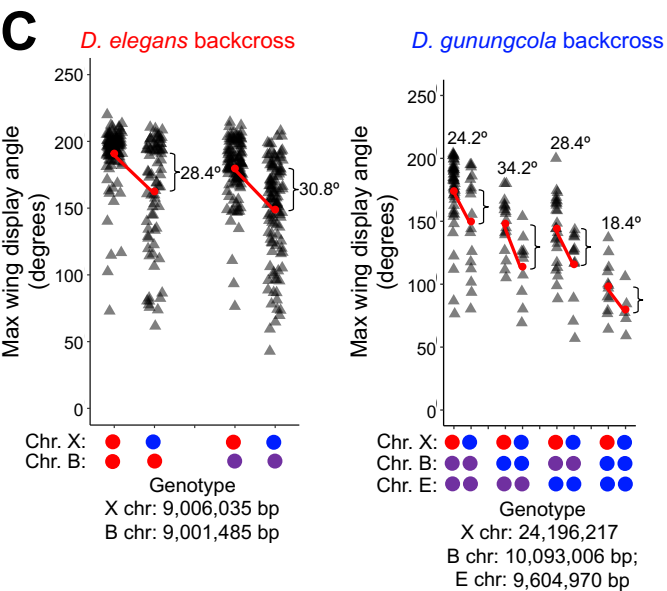

**Genotype Key**

● *D. elegans* ● *D. gunungcola* ● Het.

**A****Introgression 1**Prob. Homozygous  
*D. elegans*Prob. Homozygous  
*D. gunungcola***Introgression 2**Prob. Homozygous  
*D. elegans*Prob. Homozygous  
*D. gunungcola***Introgression 3**Prob. Homozygous  
*D. elegans*Prob. Homozygous  
*D. gunungcola*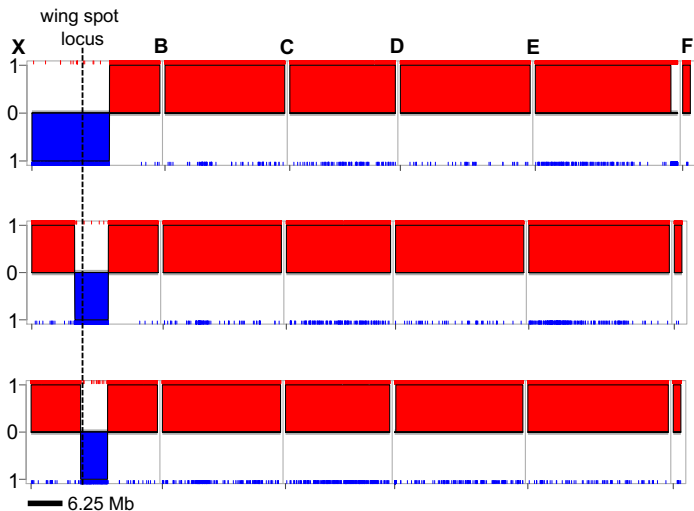**B***D. elegans*

Introgression 1

Introgression 2

Introgression 3

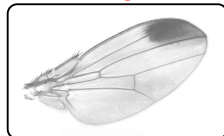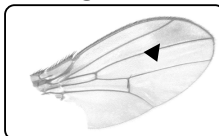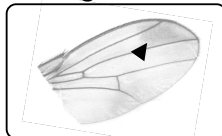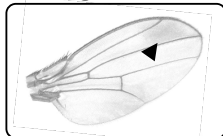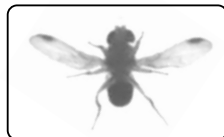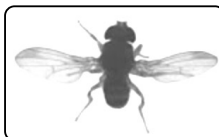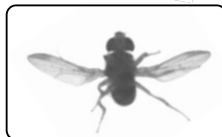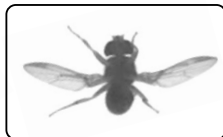**C**Max wing display angle  
(degrees)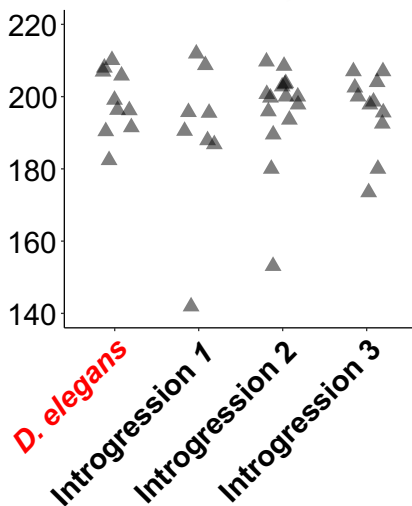

Table 1 QTLs detected for wing spot size and maximum wing display angle divergence

| Trait                  | Backcross            | Chromosome | QTL interval (bp) <sup>a</sup> | QTL peak (bp) | LOD  |
|------------------------|----------------------|------------|--------------------------------|---------------|------|
| Wing spot size         | <i>D. elegans</i>    | X          | 10,297,836-10,744,020          | 10,304,581    | 220  |
| Max wing display angle | <i>D. elegans</i>    | X          | 8,729,737-15,691,924           | 9,006,035     | 18.9 |
| Max wing display angle | <i>D. elegans</i>    | B          | 5,773,911-13,325,000           | 9,001,485     | 4.66 |
| Wing spot size         | <i>D. gunungcola</i> | X          | 10,474,499-11,584,862          | 11,223,359    | 38.9 |
| Max wing display angle | <i>D. gunungcola</i> | X          | 16,885,658-25,539,528          | 24,196,217    | 4.23 |
| Max wing display angle | <i>D. gunungcola</i> | B          | 7,078,659-12,180,268           | 10,093,006    | 6.28 |
| Max wing display angle | <i>D. gunungcola</i> | E          | 3,813,413-11,535,144           | 9,604,970     | 7.59 |

<sup>a</sup> LOD drop 1.5 support interval
